# Supplementary material for: An efficient catalytic method for hydrophosphination of heterocumulenes with diethylzinc as precatalyst without a solvent
Source: Royal Society of Chemistry journal article supplement (doi:10.1039/d1dt02706a), 2021-01-01
Supplement: d1dt02706a1.pdf [file d1dt02706a1.pdf]

# An Efficient Catalytic Method for Hydrophosphination of Heterocumulenes with Diethylzinc as Precatalyst

## Table of Contents

|                                                                                                                                           |    |
|-------------------------------------------------------------------------------------------------------------------------------------------|----|
| General Procedures.....                                                                                                                   | 1  |
| Syntheses of Zinc Compounds EtZnPPH <sub>2</sub> (A) and [{Ph <sub>2</sub> PC(N <sup>i</sup> Pr) <sub>2</sub> ZnEt] <sub>2</sub> (C)..... | 2  |
| Crystal Structural Data and Refinement Details for Compound C .....                                                                       | 7  |
| General Catalytic Procedure for the Hydrophosphination of Heterocumulenes.....                                                            | 8  |
| Spectroscopic Data .....                                                                                                                  | 9  |
| References .....                                                                                                                          | 28 |

## General Procedures

All manipulations were carried out under a purified nitrogen atmosphere using Schlenk techniques or inside a Mbraun MB 150-GI glove box. All solvents were refluxed over the appropriate drying agents and distilled prior to use. Commercially available chemicals were purchased from J&K chemical or Aldrich and used as received. No <sup>31</sup>P-NMR-silent material was formed in all reactions, so we determined the catalytic yields by <sup>31</sup>P NMR. <sup>1</sup>H, <sup>13</sup>C, and <sup>31</sup>P NMR spectra were recorded with a Varian Mercury Plus 400 MHz or Bruker Avance III 700 MHz spectrometer. Compounds

LAlH<sub>2</sub> (L = HC(CMeNAr)<sub>2</sub>, Ar = 2,6- Et<sub>2</sub>C<sub>6</sub>H<sub>3</sub>) (**1**), and LZnEt (**2**) were prepared according to the literature procedures.<sup>[1][2]</sup> Organophosphorus compounds **9i**, **9f**, **9j** and **9k** are new compounds. All other hydrophosphination products reported in this paper are known compounds which synthetic methods and catalytic reactions have been reported several times.<sup>[3-9]</sup>

CCDC- 2097921 (C) contain the supplementary crystallographic data for this paper. This data can be obtained free of charge from The Cambridge Crystallographic Data Centre via [www.ccdc.cam.ac.uk/ data\\_request/cif](http://www.ccdc.cam.ac.uk/data_request/cif).

## Syntheses of Zinc Compounds EtZnPPH<sub>2</sub> (A) and [{Ph<sub>2</sub>PC(N<sup>i</sup>Pr)<sub>2</sub>ZnEt]<sub>2</sub> (C)

**Scheme S1.** Synthesis of Zinc Compound EtZnPPH<sub>2</sub> (A)

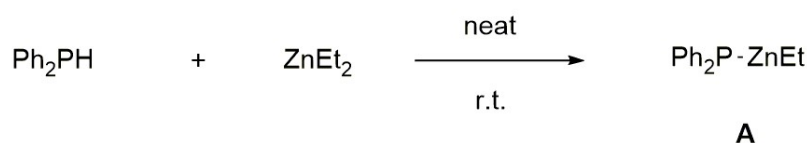

**Method for Preparation of EtZnPPH<sub>2</sub> (A):** ZnEt<sub>2</sub> (1 M in hexane, 1 mL, 1 mmol) was added at room temperature to Ph<sub>2</sub>PH (0.186 g, 1 mmol) under nitrogen atmosphere, and the reaction mixture was stirred for additional 12 h. The crude product was washed with hexane to afford white powder of **A** and dried in vacuo. (0.133 g, yield 67% based on Ph<sub>2</sub>PH); m.p. >300 °C. It can be found that **A** is present in polymeric form from Figure S1, because , which is consistent with the conclusion of *J. G. Noltes*.<sup>[10]</sup> <sup>1</sup>H NMR (400 MHz, CDCl<sub>3</sub>, ppm) δ 7.39 – 7.11 (m, 10H, Ar-*H*), 1.28 – 1.14 (d, *J* = 5.6 Hz, 3H, CH<sub>3</sub>), 0.83 – 0.78 (d, *J* = 6.3 Hz, 2H, CH<sub>2</sub>). <sup>13</sup>C NMR (176 MHz, CDCl<sub>3</sub>, ppm) δ 136.00, 135.03 – 132.86 (m), 129.54 – 126.79 (m), 24.45, 15.45. <sup>31</sup>P NMR (162 MHz, CDCl<sub>3</sub>, ppm) δ -14.95.

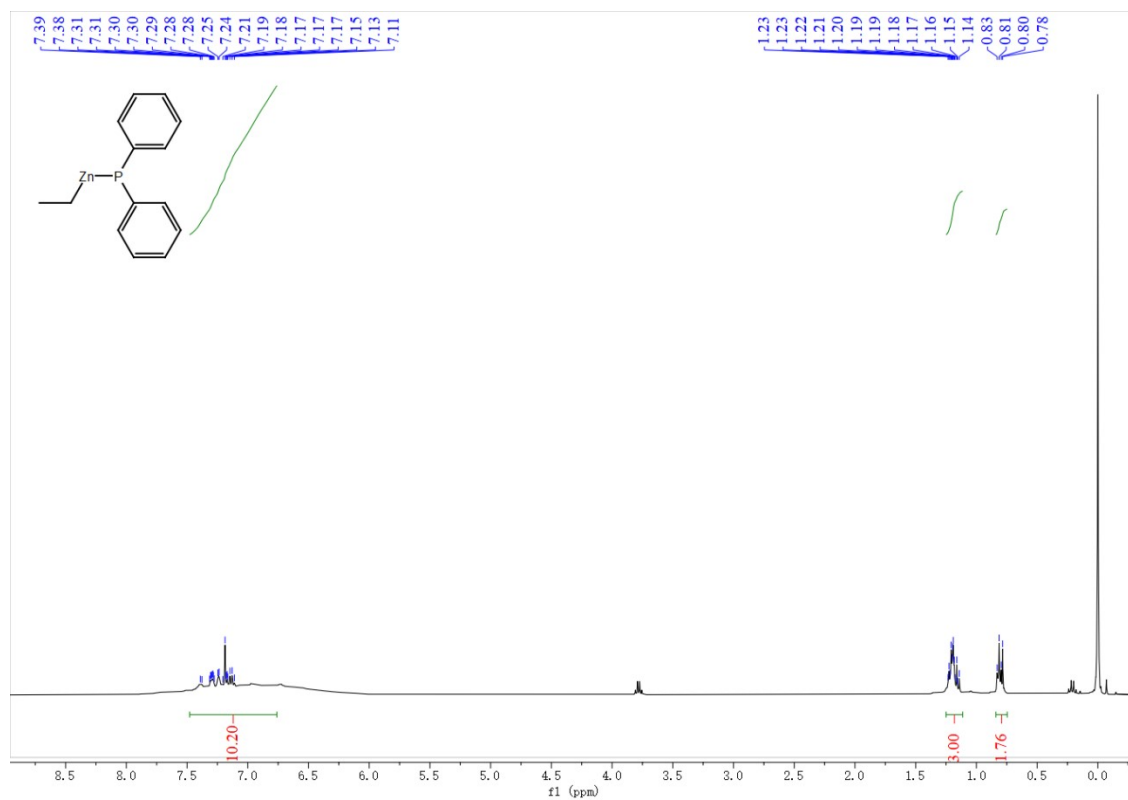

**Figure S1.** <sup>1</sup>H NMR spectrum (400 MHz, 298K, CDCl<sub>3</sub>) of A

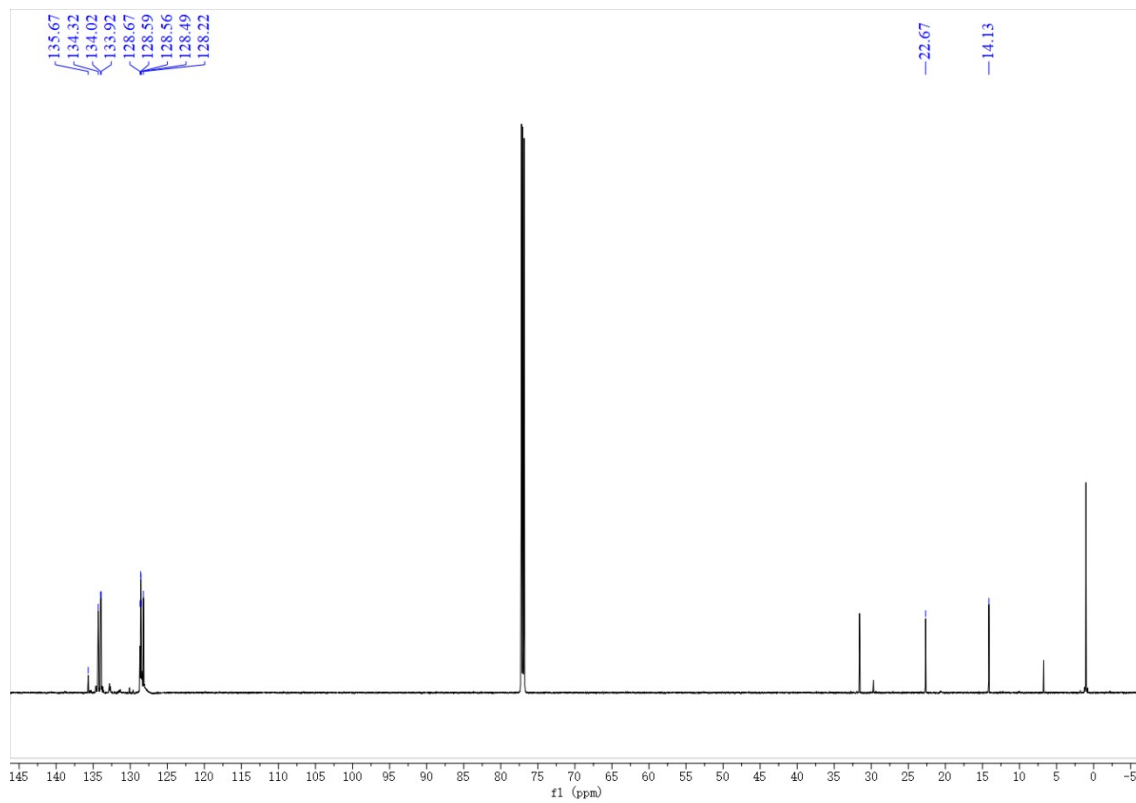

**Figure S2.**  $^{13}\text{C}$  NMR spectrum (176 MHz, 298K,  $\text{CDCl}_3$ ) of **A**

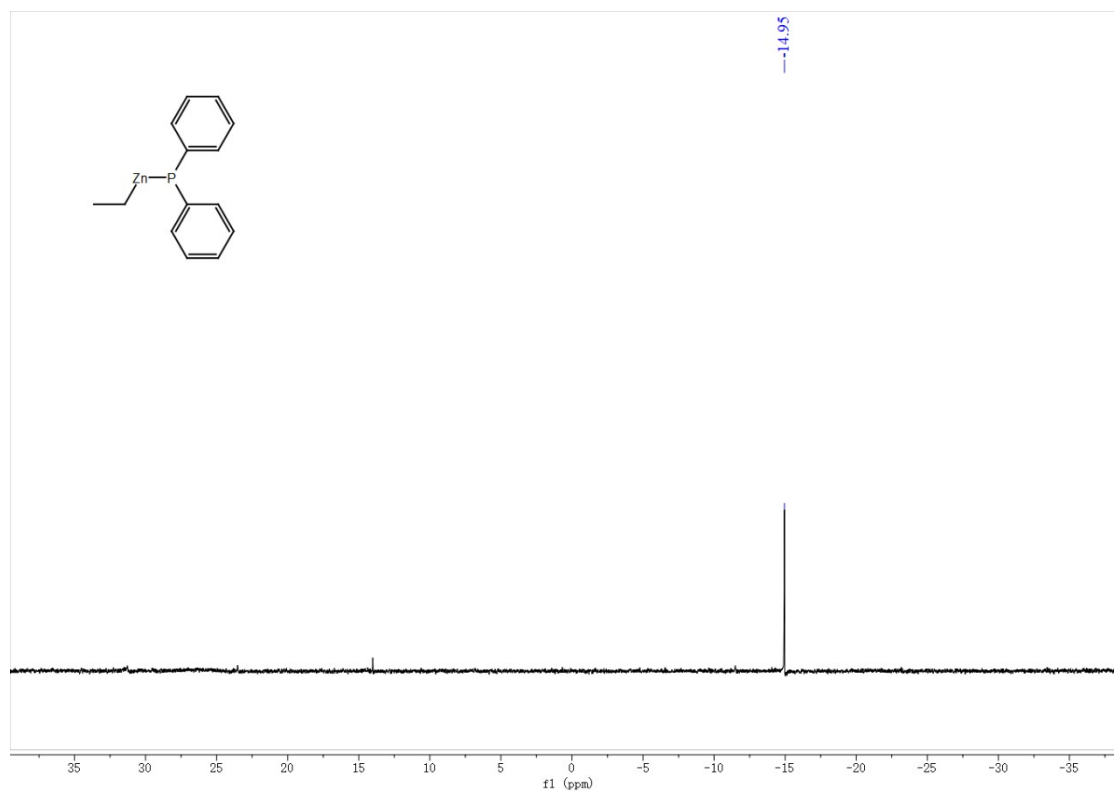

**Figure S3.**  $^{31}\text{P}$  NMR spectrum (162 MHz, 298K,  $\text{CDCl}_3$ ) of **A**

**Scheme S2.** Synthesis of Zinc Compound [ $\{\text{Ph}_2\text{PC}(\text{N}^i\text{Pr})_2\}\text{ZnEt}_2$ ] (**C**)

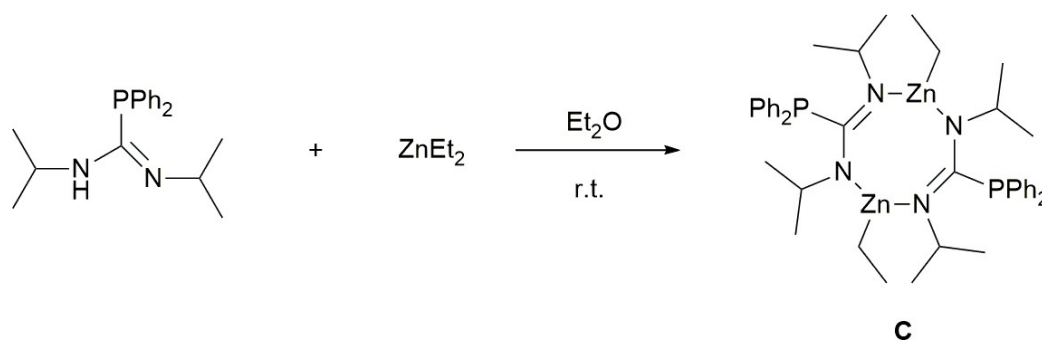

**Method for Preparation of [ $\{\text{Ph}_2\text{PC}(\text{N}^i\text{Pr})_2\}\text{ZnEt}_2$ ] (**C**):**  $\text{ZnEt}_2$  (1 M in hexane, 1 mL, 1 mmol)

was added at room temperature to a solution of  $^i\text{PrN}=\text{C}(\text{PPh}_2)(\text{NH}^i\text{Pr})$  (**9a**) (0.311 g, 1 mmol) in

$\text{Et}_2\text{O}$  (5 mL) under nitrogen atmosphere, and the reaction mixture was stirred for additional 12 h,

stored overnight at  $-32\text{ }^{\circ}\text{C}$ . The crude product was crystallized from toluene to afford colorless crystals of **C** and dried in vacuo. (0.63 g, yield 59% based on  $i\text{PrN}=\text{C}(\text{PPh}_2)(\text{NH}i\text{Pr})$  (**9a**)); m.p.  $97\sim 102\text{ }^{\circ}\text{C}$ .  $^1\text{H}$  NMR (400 MHz,  $\text{CDCl}_3$ , ppm)  $\delta$  7.73 – 7.63 (m, 2H, *NH*), 7.52 – 6.91 (m, 20H, *Ar-H*), 3.57 – 3.41 (hept,  $J = 6.4\text{ Hz}$ , 4H,  $\text{CH}(\text{CH}_3)_2$ ), 1.19 – 1.11 (d,  $J = 6.4\text{ Hz}$ , 30H,  $\text{CH}_3$ ), 0.91 – 0.89 (d,  $J = 4.3\text{ Hz}$ , 4H,  $\text{CH}_2$ );  $^{13}\text{C}$  NMR (176 MHz,  $\text{CDCl}_3$ , ppm)  $\delta$  157.47, 139.46 – 130.92 (d,  $J = 19.5\text{ Hz}$ ), 131.85, 54.06 – 50.71 (d,  $J = 36.1\text{ Hz}$ ), 50.43, 44.59, 28.72 – 20.54 (d,  $J = 20.8\text{ Hz}$ ), 23.24, 8.65, 4.38.  $^{31}\text{P}$  NMR (162 MHz,  $\text{CDCl}_3$ , ppm)  $\delta$  -17.70. **Anal Calcd** for  $\text{C}_{42}\text{H}_{58}\text{N}_4\text{P}_2\text{Zn}_2$ : C, 62.15; H, 7.20; N, 6.90. Found, C, 54.58; H, 6.095; N, 6.31.

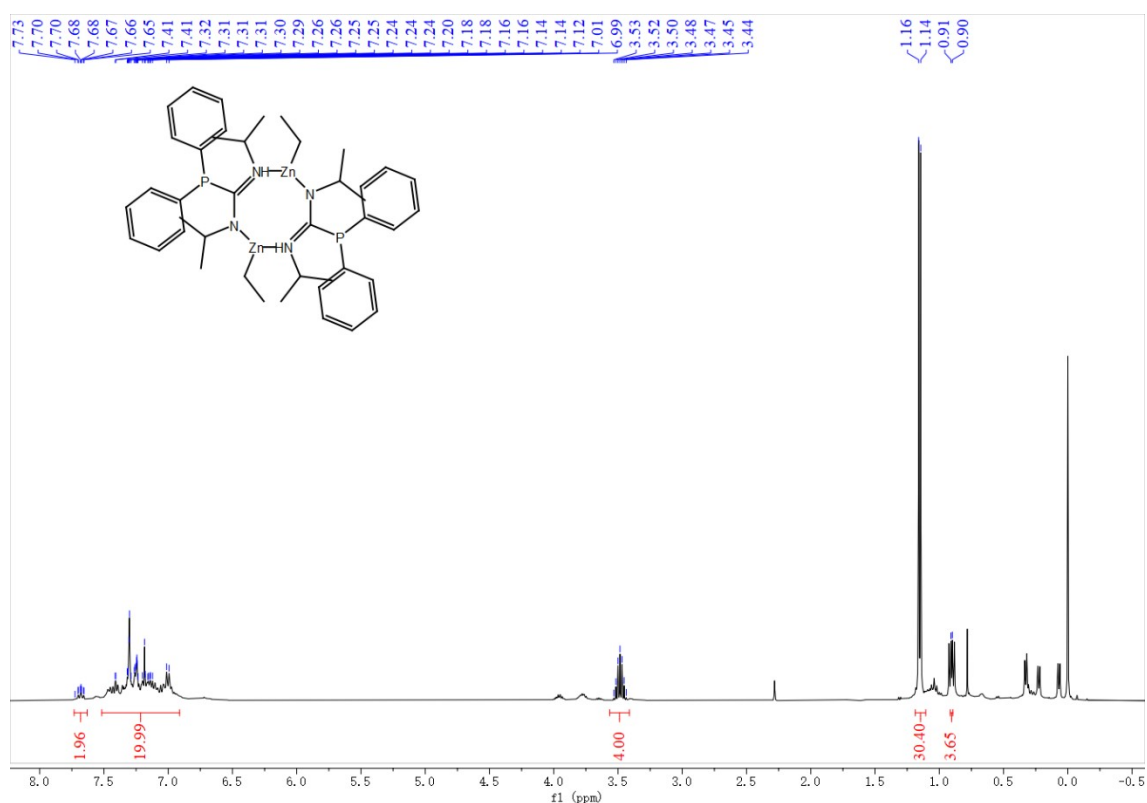

**Figure S4.**  $^1\text{H}$  NMR spectrum (400 MHz, 298K,  $\text{CDCl}_3$ ) of **C**

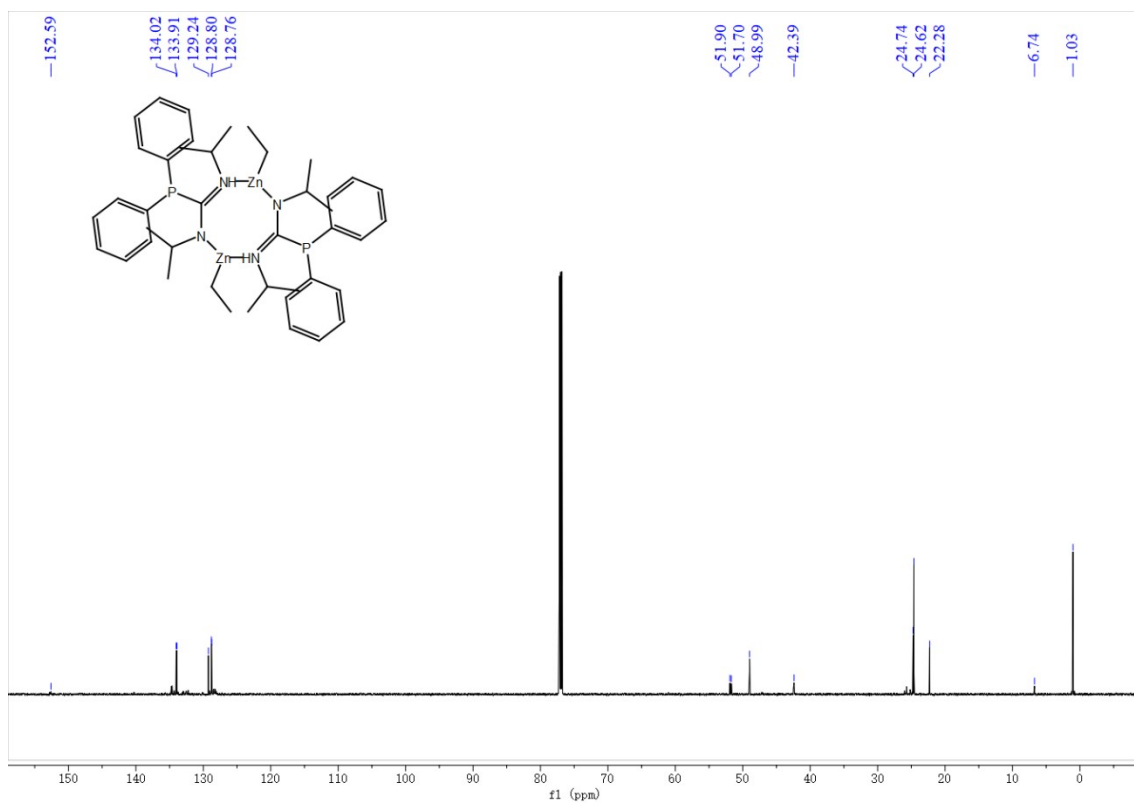

**Figure S5.**  $^{13}\text{C}$  NMR spectrum (176 MHz, 298K,  $\text{CDCl}_3$ ) of **C**

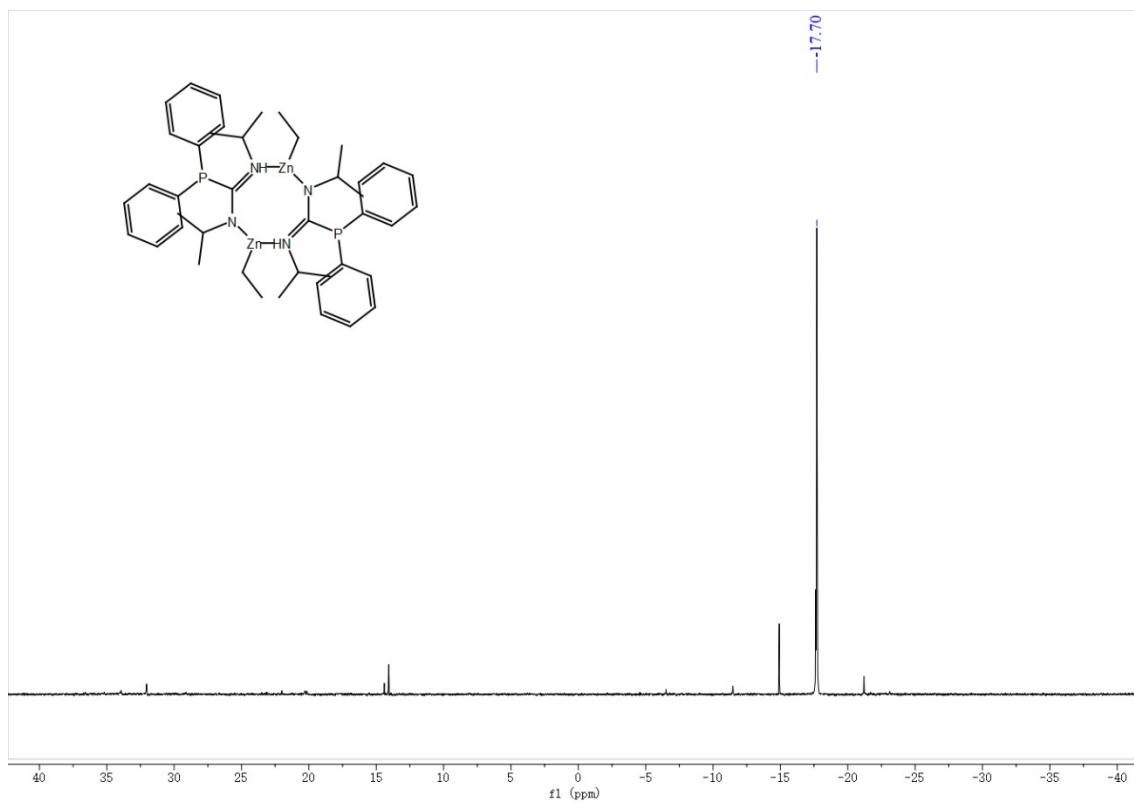

**Figure S6.**  $^{31}\text{P}$  NMR spectrum (162 MHz, 298K,  $\text{CDCl}_3$ ) of **C**

## Crystal Structural Data and Refinement Details for Compound **C**

The single crystal of **C** was mounted with glue on a glass fiber and crystal data were collected on the Rigaku AFC10 Saturn724 + ( $2 \times 2$  bin mode) diffractometer equipped with graphite-monochromated Mo  $K\alpha$  radiation ( $\lambda = 0.71073 \text{ \AA}$ ). Empirical absorption correction was applied using the SADABS program.<sup>[11]</sup> The structure was solved by the SHELXT-2014 program<sup>[12]</sup> and refined by full-matrix least squares on F2 using the SHELXL-2016 program.<sup>[13]</sup> The summary of the crystal data are given in Table S1.

**Table S1:** Single crystal X-ray structural data and refinement details for compound **C**.

| Compound          | <b>C</b>                                                    |
|-------------------|-------------------------------------------------------------|
| CCDC              | 2097921                                                     |
| Empirical formula | $\text{C}_{42}\text{H}_{58}\text{N}_4\text{P}_2\text{Zn}_2$ |
| Formula weight    | 811.60                                                      |
| Temperature (K)   | 296.15                                                      |
| Crystal system    | triclinic                                                   |
| Space group       | P-1                                                         |
| $a$ (Å)           | 8.4939(4)                                                   |
| $b$ (Å)           | 14.3347(7)                                                  |
| $c$ (Å)           | 18.6216(9)                                                  |
| $\alpha$ (°)      | 101.438(2)                                                  |

|                                                                                          |                     |
|------------------------------------------------------------------------------------------|---------------------|
| $\beta$ (°)                                                                              | 98.239(2)           |
| $\gamma$ (°)                                                                             | 106.0400(10)        |
| Volume (Å <sup>3</sup> )                                                                 | 2088.01(18)         |
| <i>Z</i>                                                                                 | 2                   |
| $\rho_{\text{calc}}$ (g/cm <sup>3</sup> )                                                | 1.291               |
| $\mu$ (mm <sup>-1</sup> )                                                                | 1.258               |
| Crystal size (mm)                                                                        | 0.2 × 0.15 ×<br>0.1 |
| $\Theta$ range (deg)                                                                     | 2.282 - 49.998      |
| Reflections collected                                                                    | 20416               |
| <i>R</i> (int)                                                                           | 0.0662              |
| Data/restraints/parameter<br>s                                                           | 7329/0/451          |
| <i>F</i> (000)                                                                           | 856.0               |
| <i>R</i> 1 <sup>a</sup> , <i>wR</i> 2 <sup>b</sup> ( <i>I</i> > 2 $\sigma$ ( <i>I</i> )) | 0.0271, 0.0669      |
| <i>R</i> 1 <sup>a</sup> , <i>wR</i> 2 <sup>b</sup> (all data)                            | 0.0340, 0.0689      |

---

## General Catalytic Procedure for the Hydrophosphination of Heterocumulenes

All reactions were carried out under nitrogen atmosphere. Catalyst **8** (5 mol%), heterocumulene (1 mmol) and Ph<sub>2</sub>PH (0.186g, 1 mmol) were sealed in a 10 mL Schlenk flask equipped with a magnetic stir bar inside the glove box. The reaction mixture was stirred at room temperature for



0.1 - 24 hours depending on the nature of the starting material. The progress of the reaction was monitored by  $^1\text{H}$  and  $^{31}\text{P}$  NMR spectroscopy using anisole (10 mol%) as an internal standard.

## Spectroscopic Data

$^i\text{PrN}=\text{C}(\text{PPh}_2)(\text{NH}^i\text{Pr})$  (**9a**)

White solid (99% yield).  $^1\text{H}$  NMR (400 MHz,  $\text{CDCl}_3$ , ppm)  $\delta$  7.38 – 7.26 (m, 10H, Ar-*H*), 4.05 – 3.88 (m, 2H,  $\text{CH}(\text{CH}_3)_2$ ), 3.44 – 3.36 (d,  $J = 7.2$  Hz, 1H, *NH*), 0.96 – 0.83 (dd,  $J = 10.7, 6.3$  Hz, 12H,  $\text{CH}(\text{CH}_3)_2$ ).  $^{13}\text{C}$  NMR (101 MHz,  $\text{CDCl}_3$ )  $\delta$  151.83 (d,  $J = 30.8$  Hz), 133.93 (d,  $J = 13.4$  Hz), 133.32 (d,  $J = 19.6$  Hz), 128.61, 128.09 (d,  $J = 6.9$  Hz), 52.06 (d,  $J = 35.8$  Hz), 42.79, 24.32, 21.71.

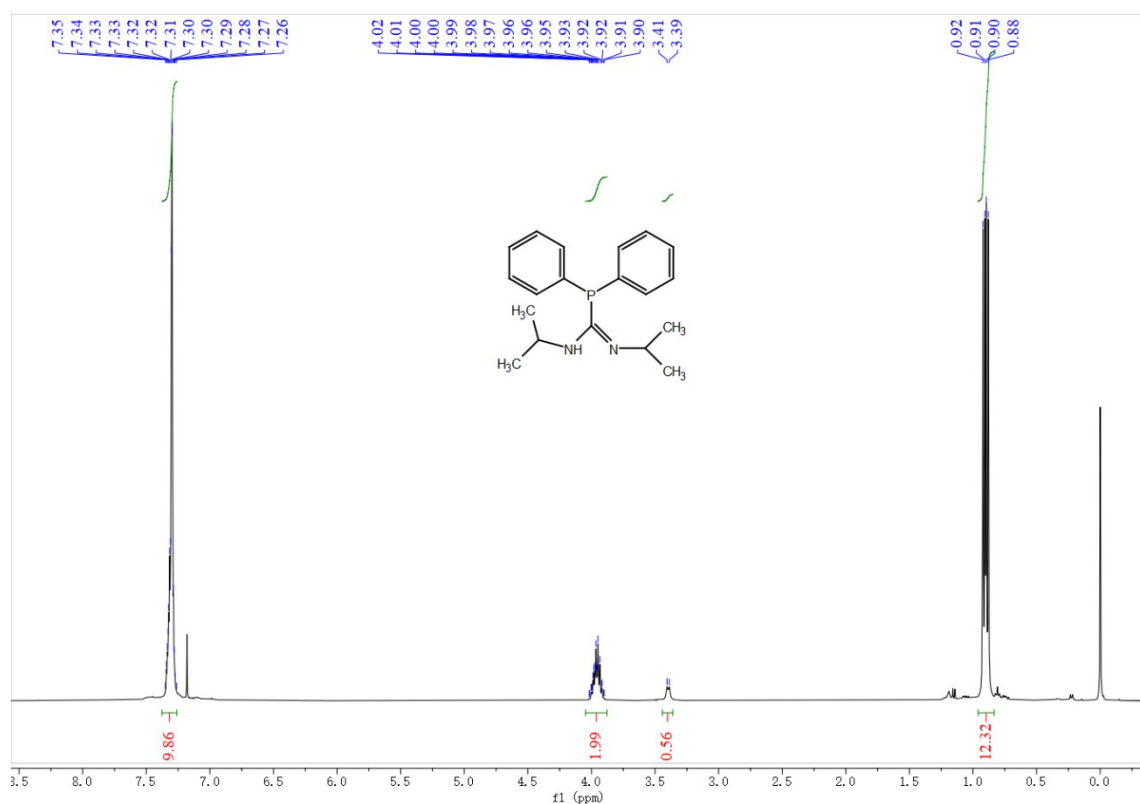

Figure S7.  $^1\text{H}$  NMR spectrum (400 MHz, 298K,  $\text{CDCl}_3$ ) of **9a**

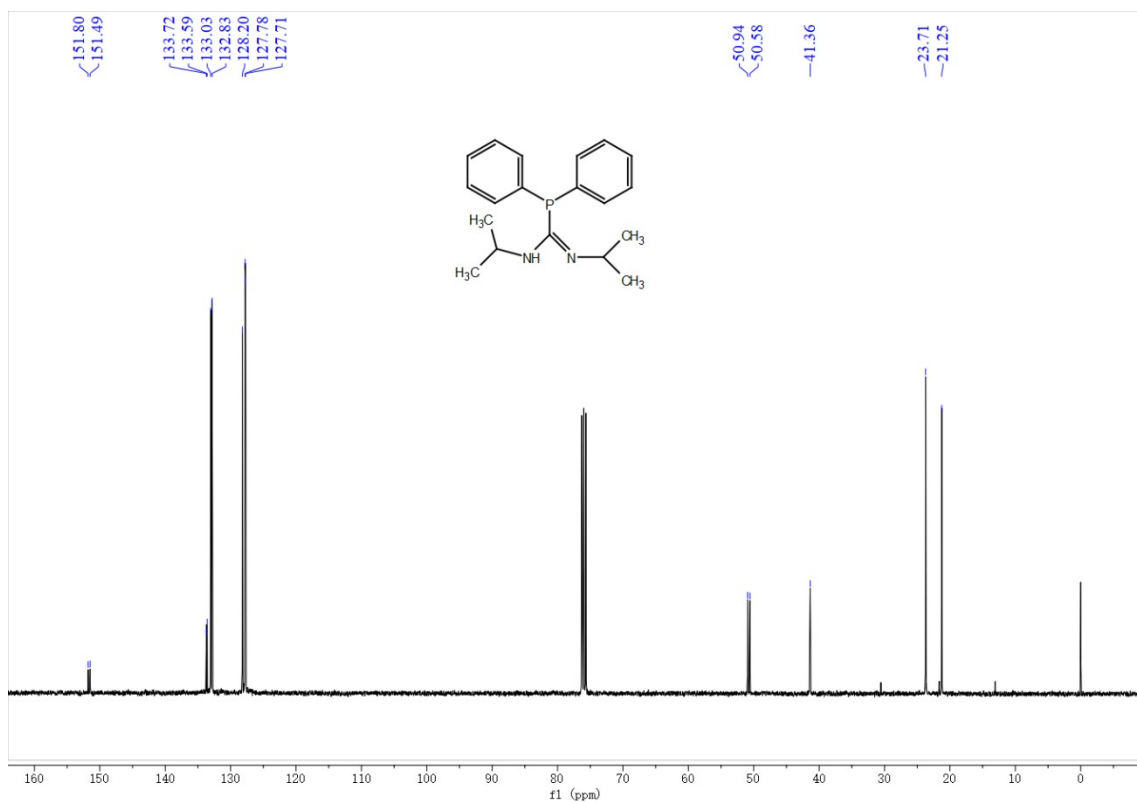

**Figure S8.** <sup>13</sup>C NMR spectrum (101 MHz, 298K, CDCl<sub>3</sub>) of **9a**

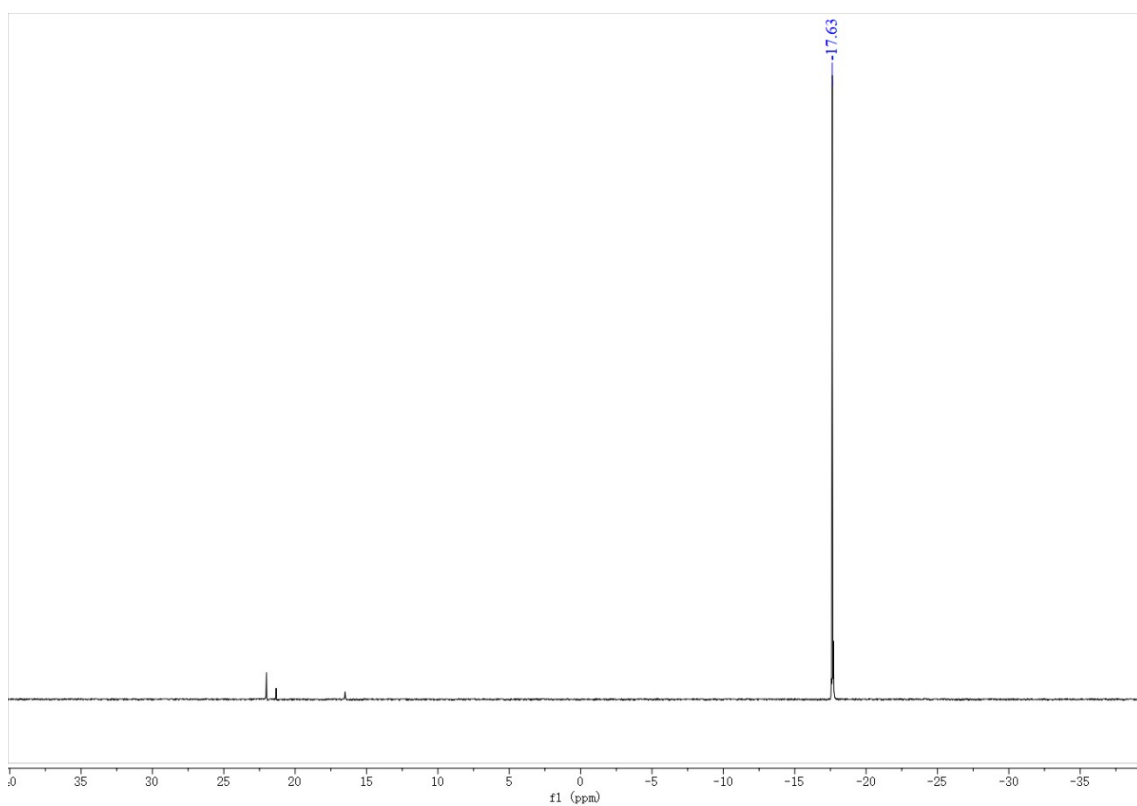

**Figure S9.** <sup>31</sup>P NMR spectrum (101 MHz, 298K, CDCl<sub>3</sub>) of **9a**

CyN=C(PPh<sub>2</sub>)(NHCy) (**9b**)

White solid (99% yield). <sup>1</sup>H NMR (400 MHz, CDCl<sub>3</sub>, ppm) δ 7.38 – 7.26 (m, 10H, Ar-*H*), 3.84 – 3.66 (m, 1H, *CH*), 3.62 – 3.46 (m, 1H, *CH*), 1.83 – 0.72 (m, 20H, Cy). <sup>13</sup>C NMR (101 MHz, CDCl<sub>3</sub>, ppm) δ 152.14 (d, *J* = 30.7 Hz), 128.35, 127.85 (d, *J* = 6.9 Hz), 59.23 (d, *J* = 34.3 Hz), 47.52, 34.38, 31.98, 25.01 (d, *J* = 12.8 Hz), 24.23, 23.18. <sup>31</sup>P NMR (162 MHz, CDCl<sub>3</sub>, ppm) δ -18.52.

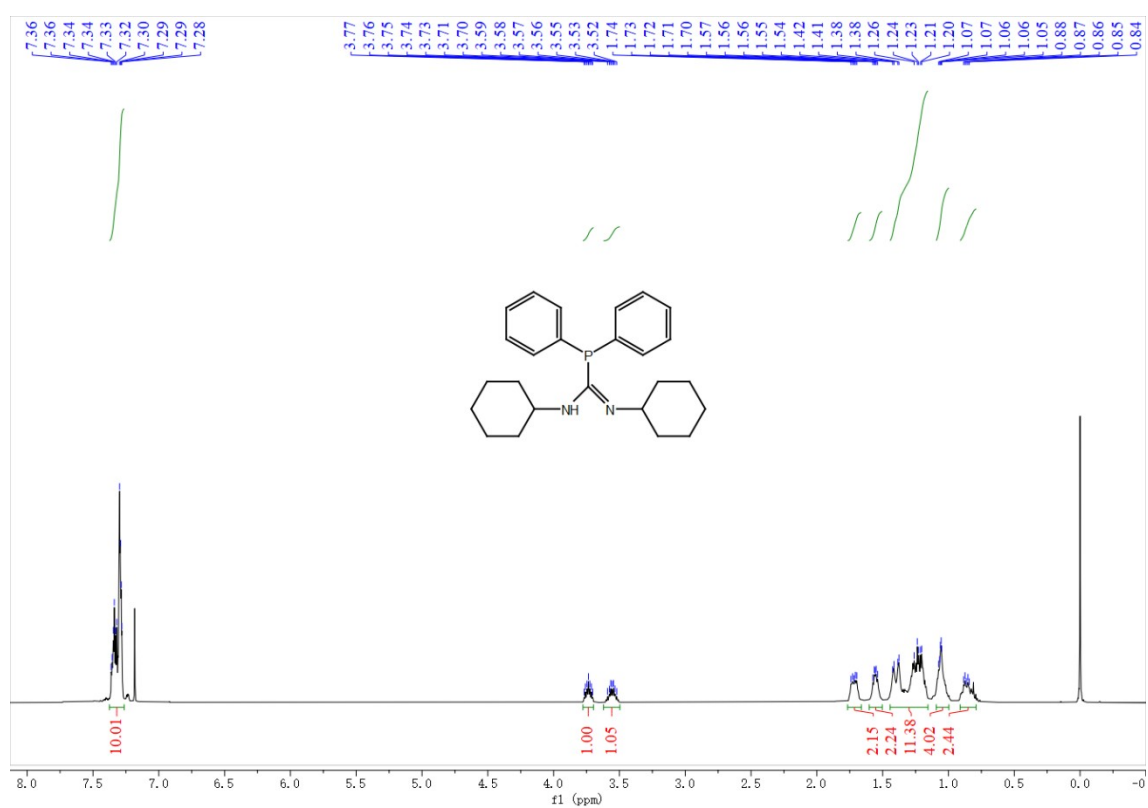

Figure S10. <sup>1</sup>H NMR spectrum (400 MHz, 298K, CDCl<sub>3</sub>) of **9b**

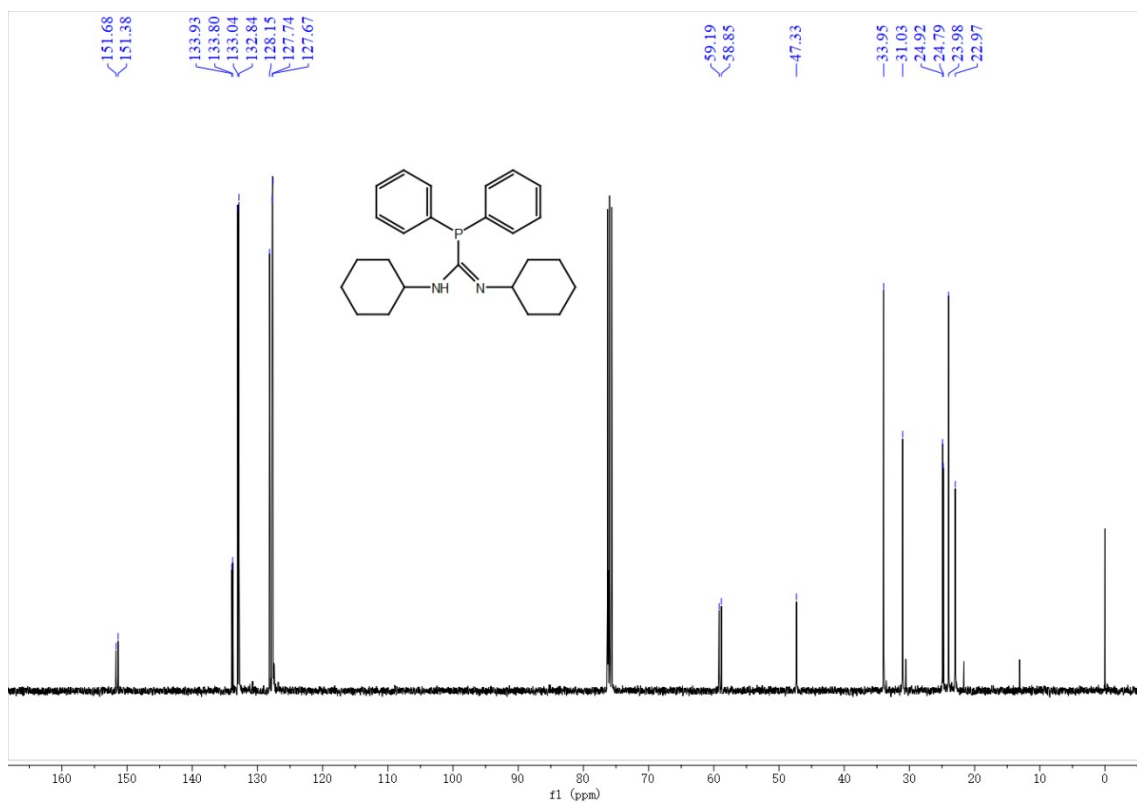

Figure S11. <sup>13</sup>C NMR spectrum (101 MHz, 298K, CDCl<sub>3</sub>) of **9b**

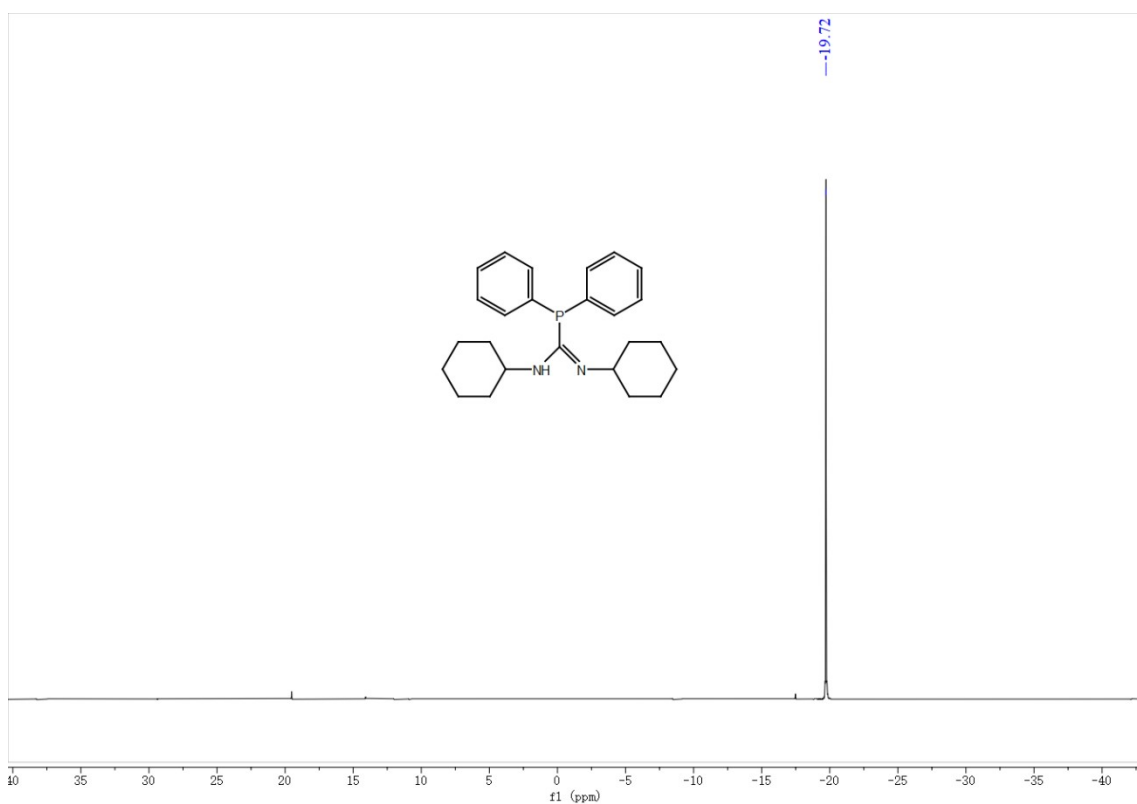

Figure S12. <sup>31</sup>P NMR spectrum (162 MHz, 298K, CDCl<sub>3</sub>) of **9b**

Ph<sub>2</sub>PC(O)NH(<sup>i</sup>Pr) (**9c**)

White solid (99% yield). <sup>1</sup>H NMR (400 MHz, CDCl<sub>3</sub>, ppm) δ 7.47 – 7.40 (m, 4H, Ar-*H*), 7.37 – 7.26 (m, 6H, Ar-*H*), 5.47 – 5.33 (d, *J* = 9.1 Hz, 1H, NH), 4.17 – 4.04 (m, 1H, CH(CH<sub>3</sub>)<sub>2</sub>), 1.02 – 0.94 (d, *J* = 6.6 Hz, 6H, CH(CH<sub>3</sub>)<sub>2</sub>). <sup>13</sup>C NMR (101 MHz, CDCl<sub>3</sub>) δ 181.24 – 171.19 (d, *J* = 13.0 Hz), 139.09 – 131.37 (m), 131.58 – 121.53 (m), 44.54, 26.00. <sup>31</sup>P NMR (162 MHz, CDCl<sub>3</sub>, ppm) δ -3.8.

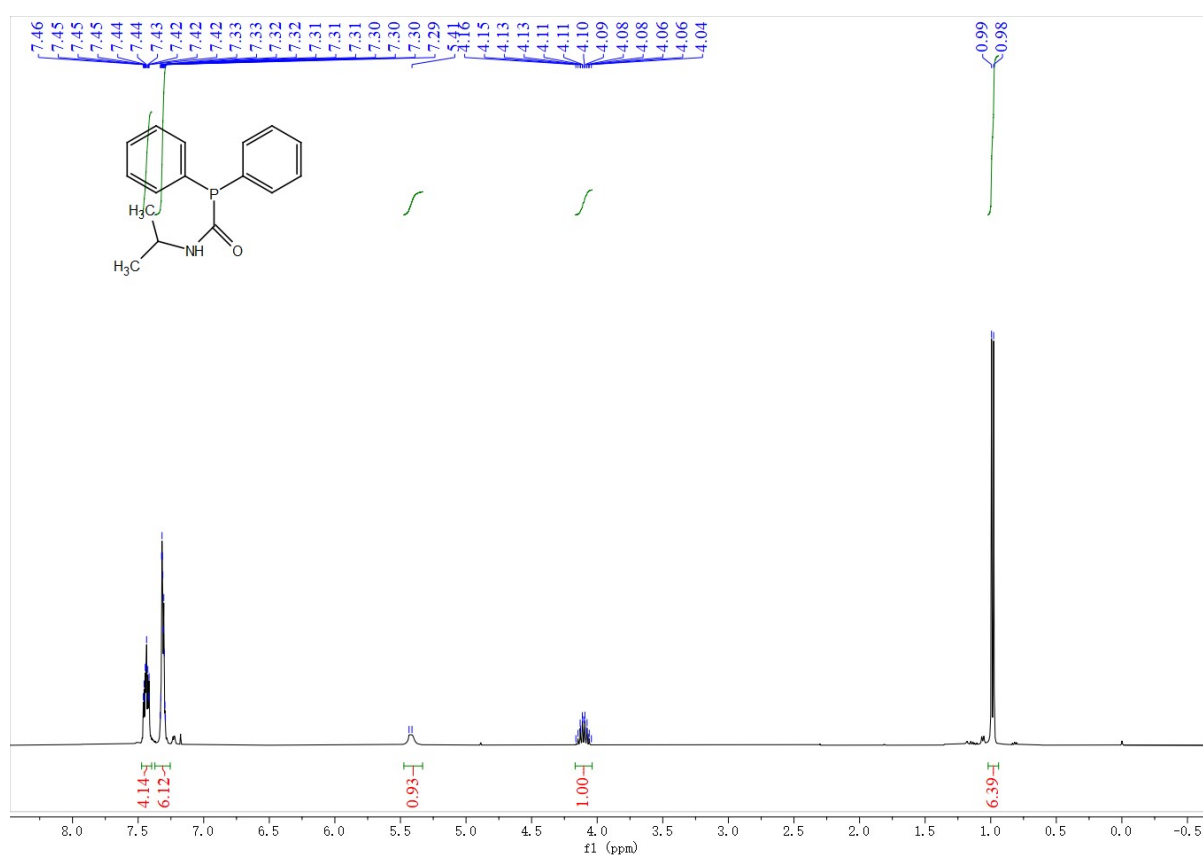

Figure S13. <sup>1</sup>H NMR spectrum (400 MHz, 298K, CDCl<sub>3</sub>) of **9c**

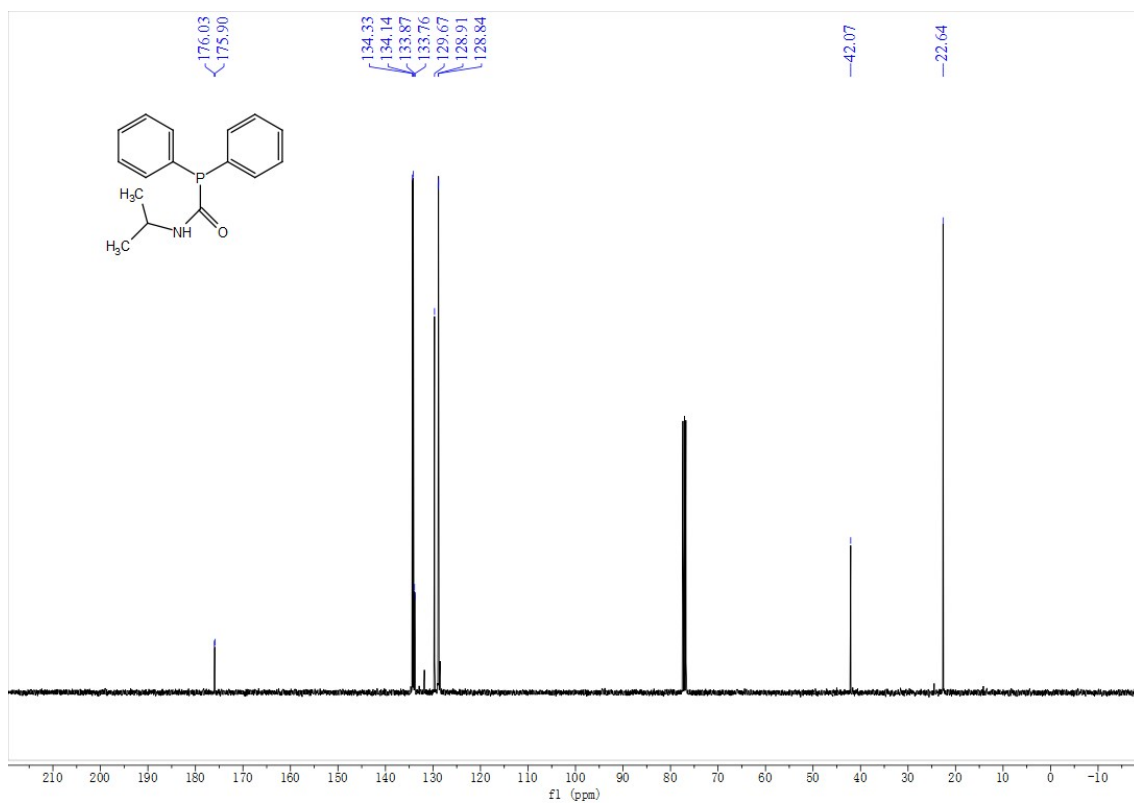

**Figure S14.** <sup>13</sup>C NMR spectrum (101 MHz, 298K, CDCl<sub>3</sub>) of 9c

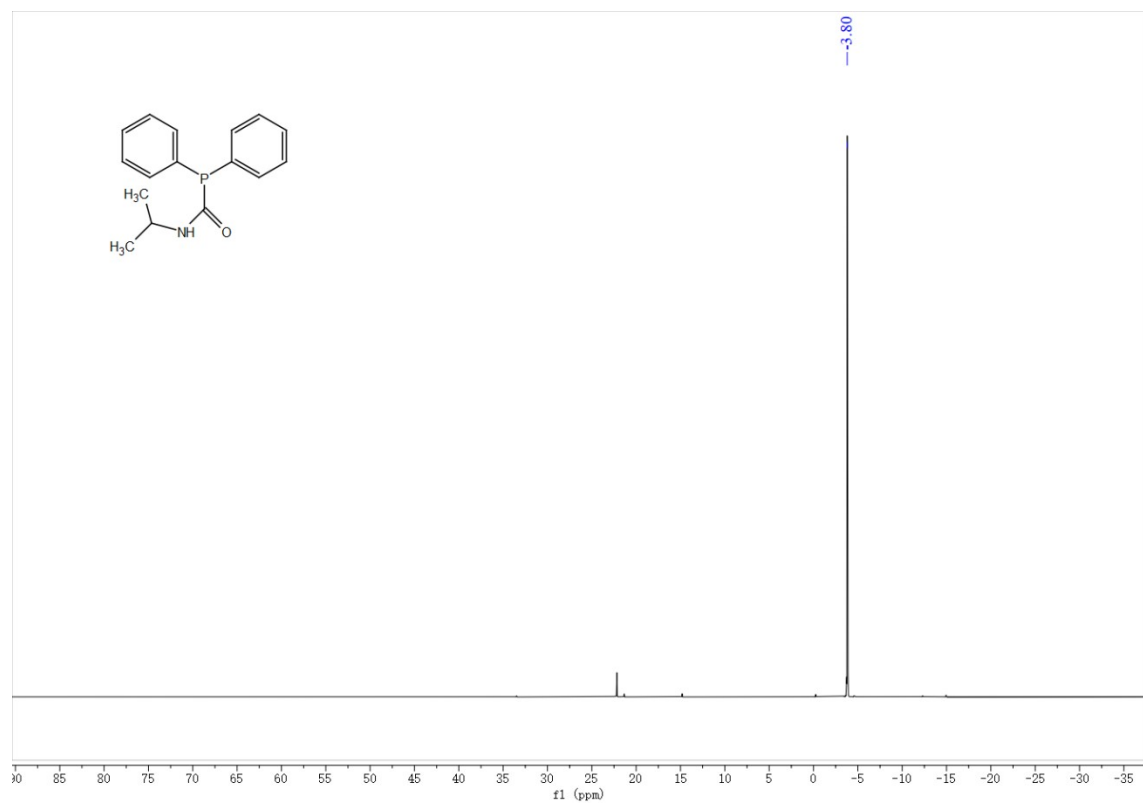

**Figure S15.**  $^{31}\text{P}$  NMR spectrum (162 MHz, 298K,  $\text{CDCl}_3$ ) of **9c**

$\text{Ph}_2\text{PC(O)NHCy}$  (**9d**)

White solid (99% yield).  $^1\text{H}$  NMR (400 MHz,  $\text{CDCl}_3$ , ppm)  $\delta$  7.52 – 7.39 (m, 4H, Ar-*H*), 7.35 – 7.28 (m, 6H, Ar-*H*), 5.56 – 5.44 (d,  $J = 8.2$  Hz, 1H, NH), 3.90 – 3.76 (m, 1H, CH), 1.87 – 1.66 (m, 2H,  $\text{CH}_2$ ), 1.57 – 1.36 (m, 3H,  $\text{CH}_2$ ), 1.35 – 1.16 (m, 2H,  $\text{CH}_2$ ), 1.13 – 0.87 (m, 3H,  $\text{CH}_2$ ).  $^{13}\text{C}$  NMR (176 MHz,  $\text{CDCl}_3$ , ppm)  $\delta$  175.86 – 175.77 (d,  $J = 3.7$  Hz), 134.41 – 134.09 (d,  $J = 19.0$  Hz), 131.07 – 123.45 (d), 59.47 – 44.74 (d,  $J = 21.9$  Hz), 37.12 – 31.71 (d,  $J = 5.3$  Hz), 27.87 – 15.56 (d,  $J = 164.3$  Hz).  $^{31}\text{P}$  NMR (162 MHz,  $\text{CDCl}_3$ , ppm)  $\delta$  -4.10.

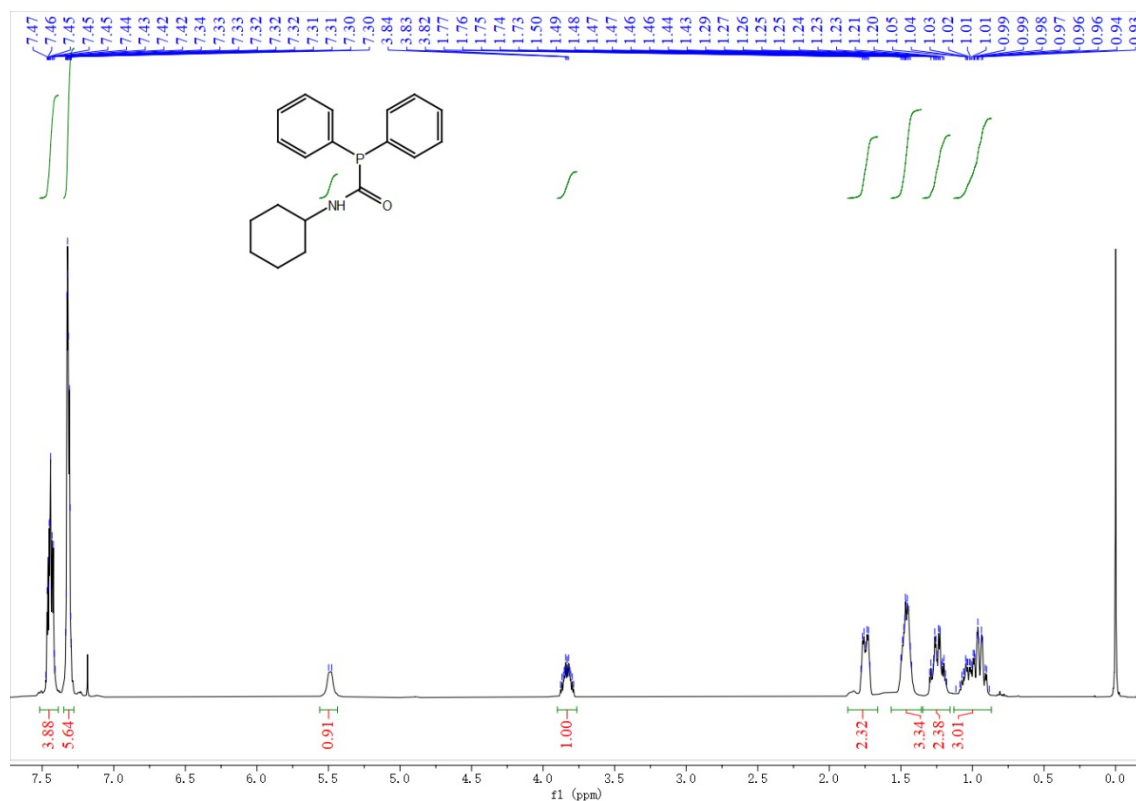

**Figure S16.**  $^1\text{H}$  NMR spectrum (400 MHz, 298K,  $\text{CDCl}_3$ ) of **9d**

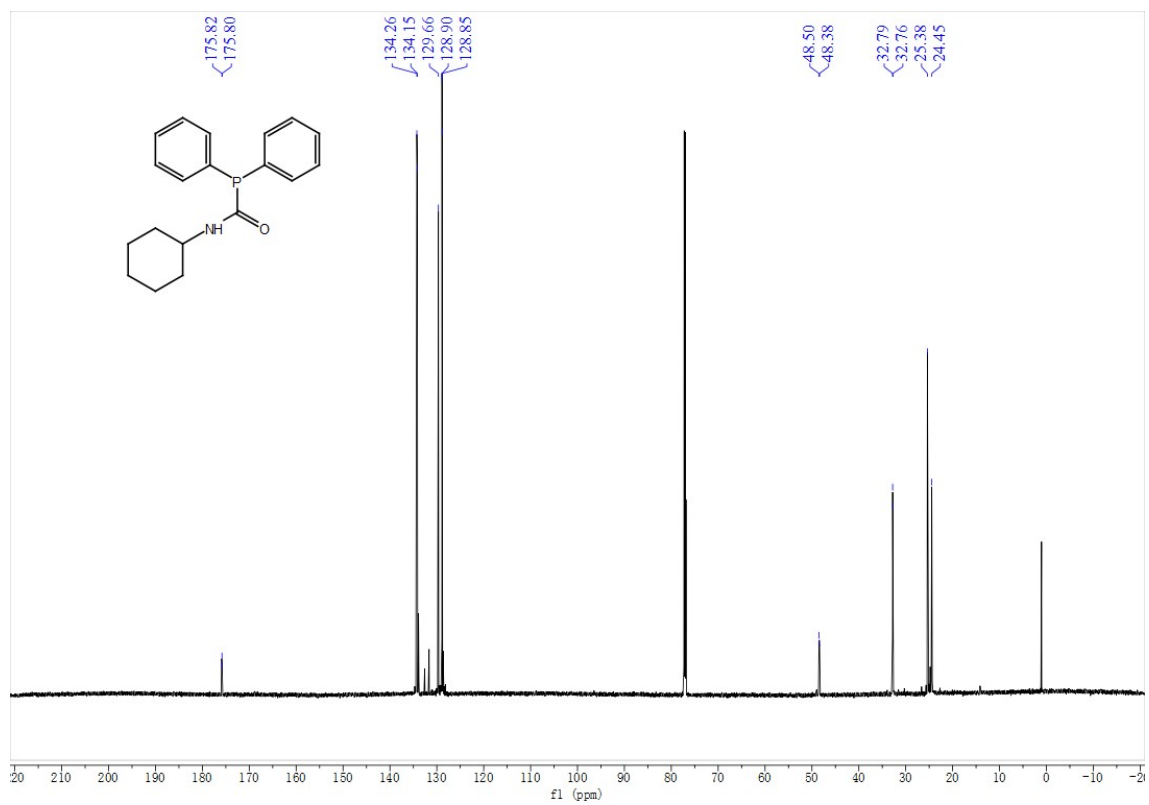

**Figure S17.** <sup>13</sup>C NMR spectrum (101 MHz, 298K, CDCl<sub>3</sub>) of 9d

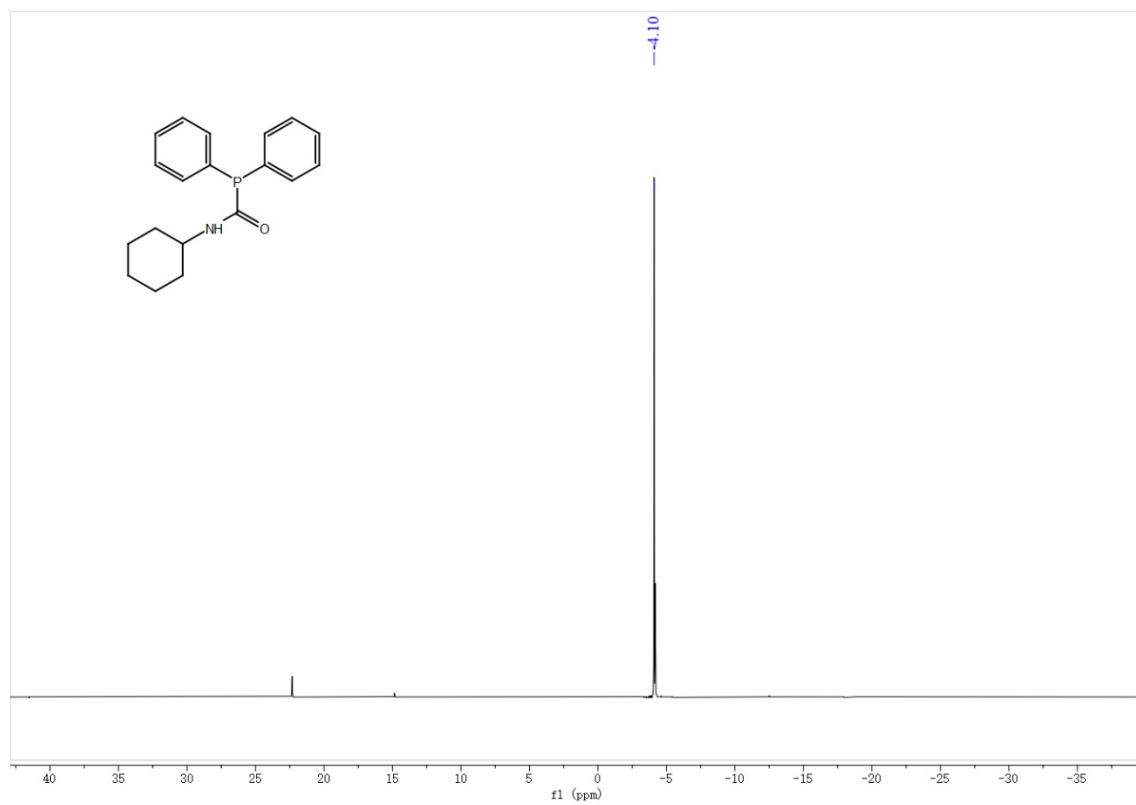



**Figure S18.**  $^{31}\text{P}$  NMR spectrum (162 MHz, 298K,  $\text{CDCl}_3$ ) of **9d**

$\text{Ph}_2\text{PC(O)NH}(\textit{t}\text{Bu})$  (**9e**)

White solid (44% yield).  $^1\text{H}$  NMR (400 MHz,  $\text{CDCl}_3$ , ppm)  $\delta$  7.51 – 7.37 (m, 4H, Ar-*H*), 7.37 – 7.26 (m, 6H, Ar-*H*), 5.52 – 5.36 (s, 1H, *NH*), 1.47 – 1.02 (s, 9H, *t*Bu).  $^{13}\text{C}$  NMR (101 MHz,  $\text{CDCl}_3$ , ppm)  $\delta$  175.24 – 174.73, 133.31 – 133.19, 133.12 – 133.00 (d,  $J = 7.1$  Hz), 129.13, 128.03 – 127.28 (d,  $J = 7.3$  Hz), 56.36 – 48.85 (d,  $J = 2.3$  Hz), 33.67.  $^{31}\text{P}$  NMR (162 MHz,  $\text{CDCl}_3$ , ppm)  $\delta$  -2.08.

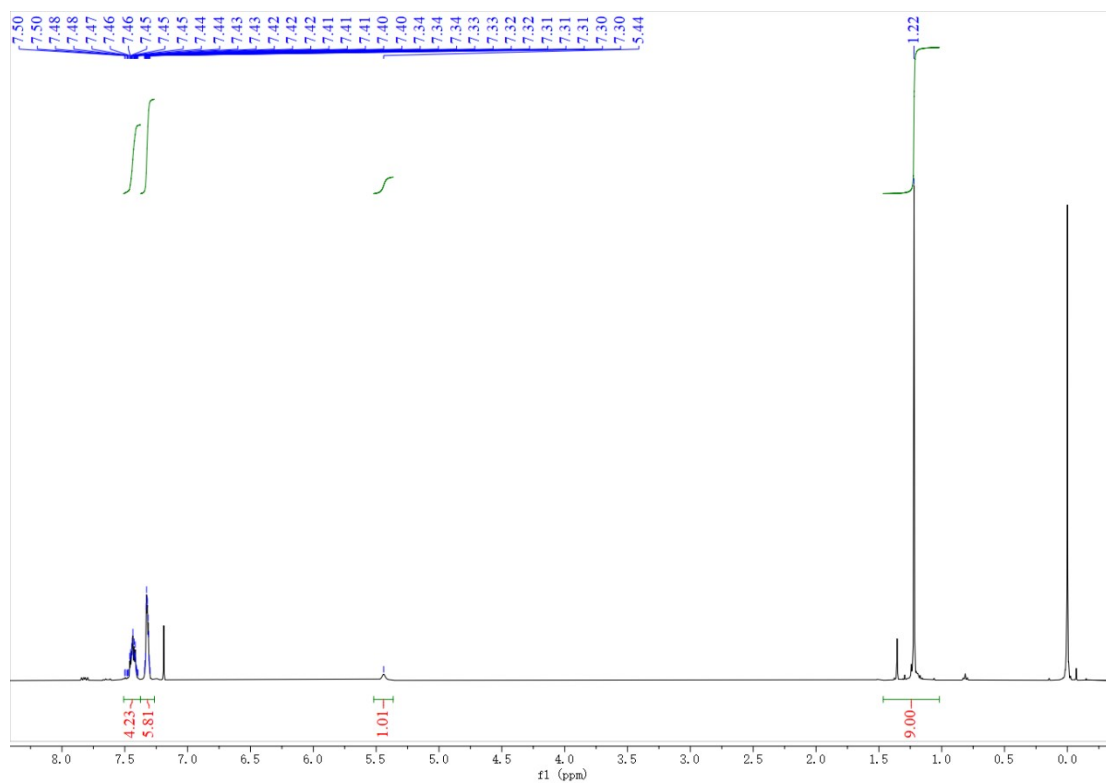

**Figure S19.**  $^1\text{H}$  NMR spectrum (400 MHz, 298K,  $\text{CDCl}_3$ ) of **9e**

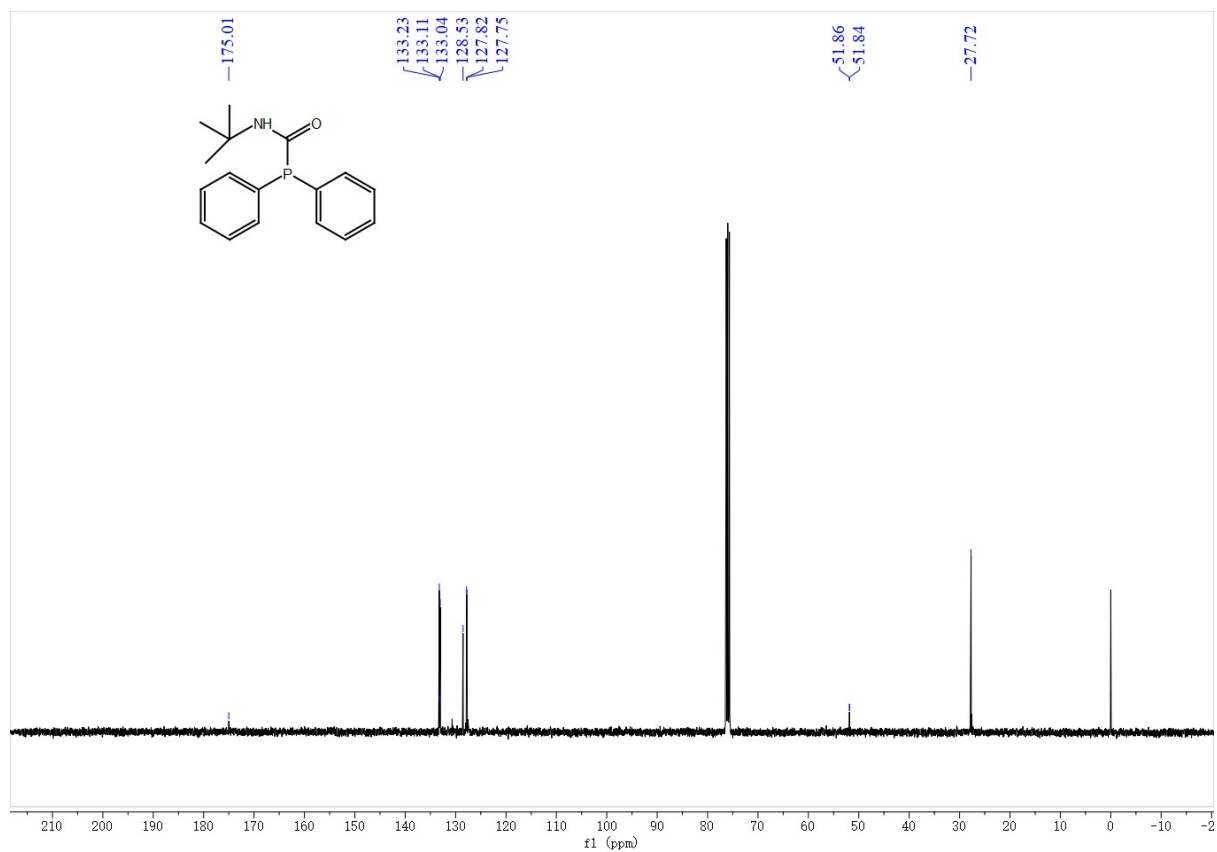

Figure S20.  $^{13}\text{C}$  NMR spectrum (101 MHz, 298K,  $\text{CDCl}_3$ ) of 9e

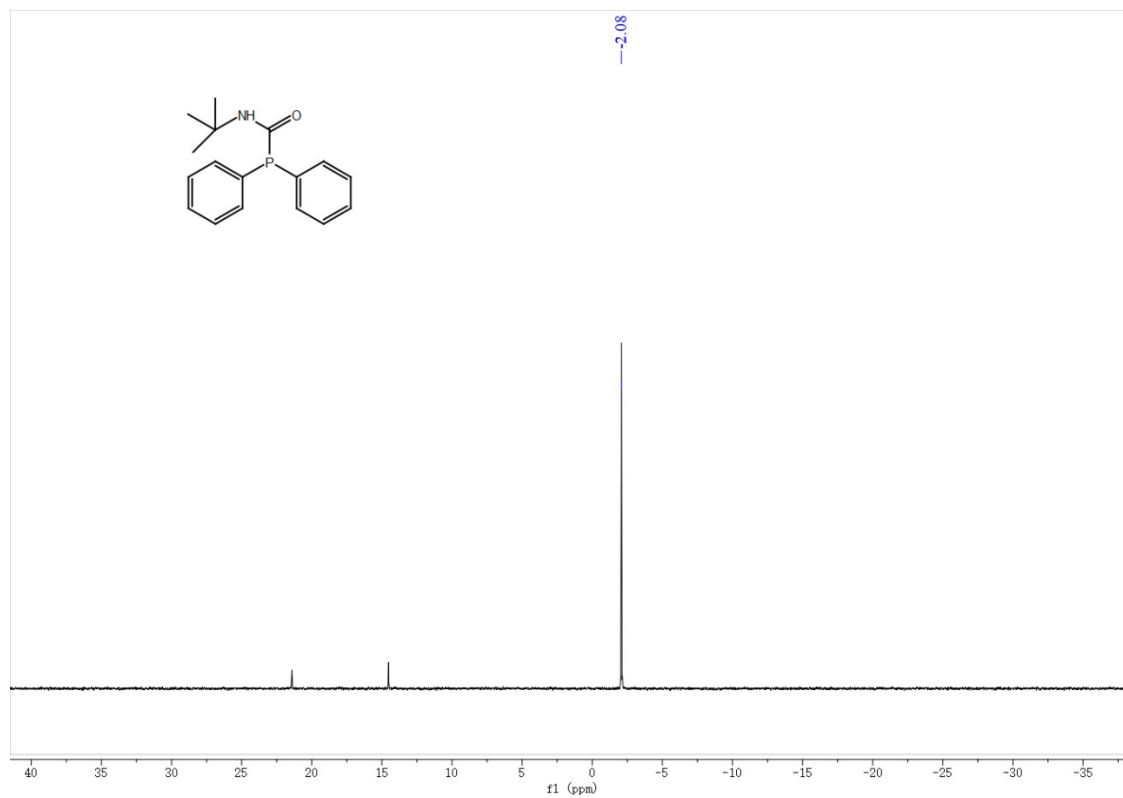

**Figure S21.**  $^{31}\text{P}$  NMR spectrum (162 MHz, 298K,  $\text{CDCl}_3$ ) of **9e**

$\text{Ph}_2\text{PC}(\text{S})\text{NH}(\text{iPr})$  (**9f**)

Green solid (98% yield).  $^1\text{H}$  NMR (400 MHz,  $\text{CDCl}_3$ , ppm)  $\delta$  7.46 – 7.29 (m, 10H, Ar-H), 7.04 – 6.91 (s, 1H, NH), 4.75 – 4.62 (m, 1H,  $\text{CH}(\text{CH}_3)_2$ ), 1.10 – 1.04 (d,  $J = 6.5$  Hz, 6H,  $\text{CH}(\text{CH}_3)_2$ ).  $^{13}\text{C}$  NMR (101 MHz,  $\text{CDCl}_3$ , ppm)  $\delta$  206.70 – 205.64 (d,  $J = 38.2$  Hz), 134.76 – 133.76 (m), 130.24 – 129.78, 129.47 – 128.72 (d,  $J = 7.4$  Hz), 56.90 – 38.43 (d,  $J = 1.7$  Hz), 27.89.  $^{31}\text{P}$  NMR (162 MHz,  $\text{CDCl}_3$ , ppm)  $\delta$  -14.38.

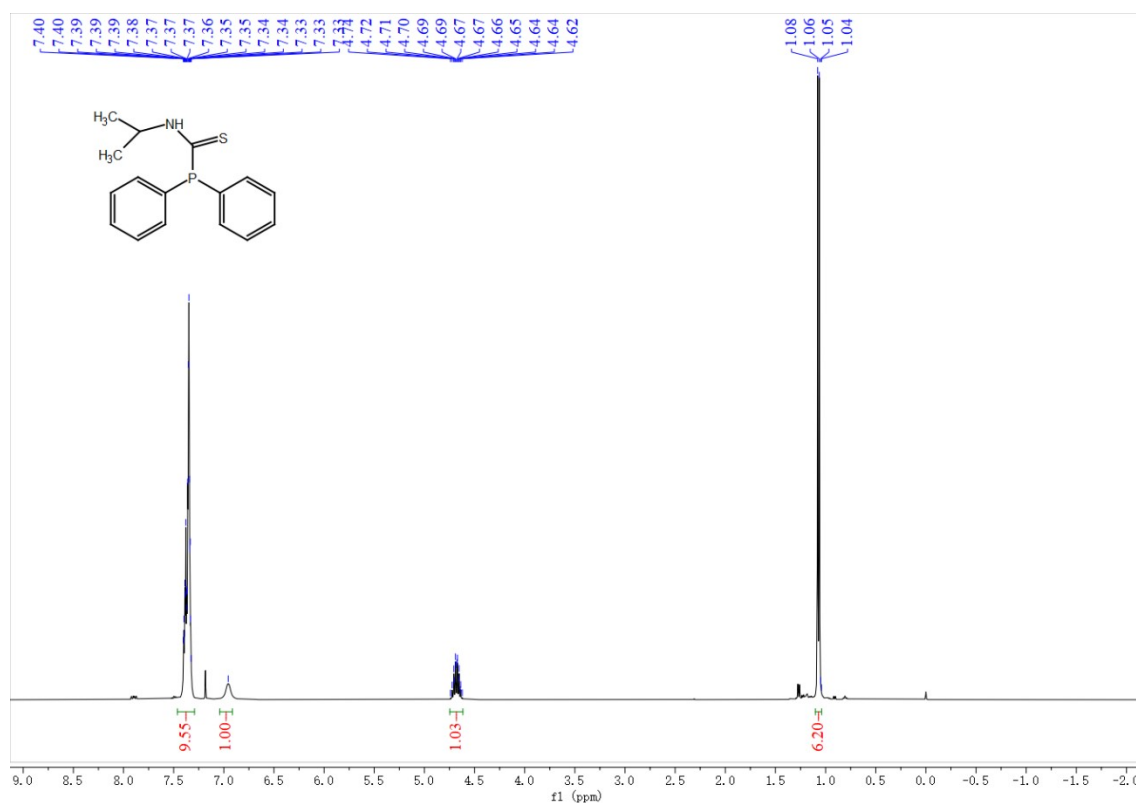

**Figure S22.**  $^1\text{H}$  NMR spectrum (400 MHz, 298K,  $\text{CDCl}_3$ ) of **9f**

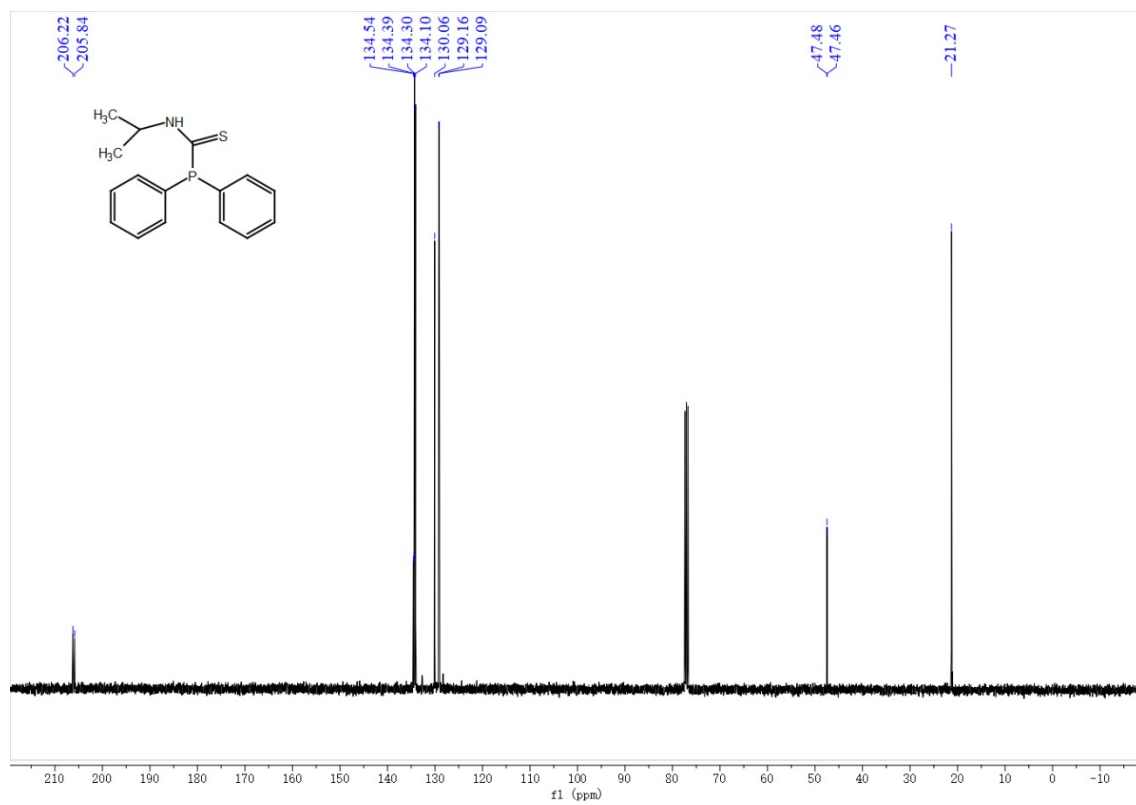

Figure S23. <sup>13</sup>C NMR spectrum (101 MHz, 298K, CDCl<sub>3</sub>) of 9f

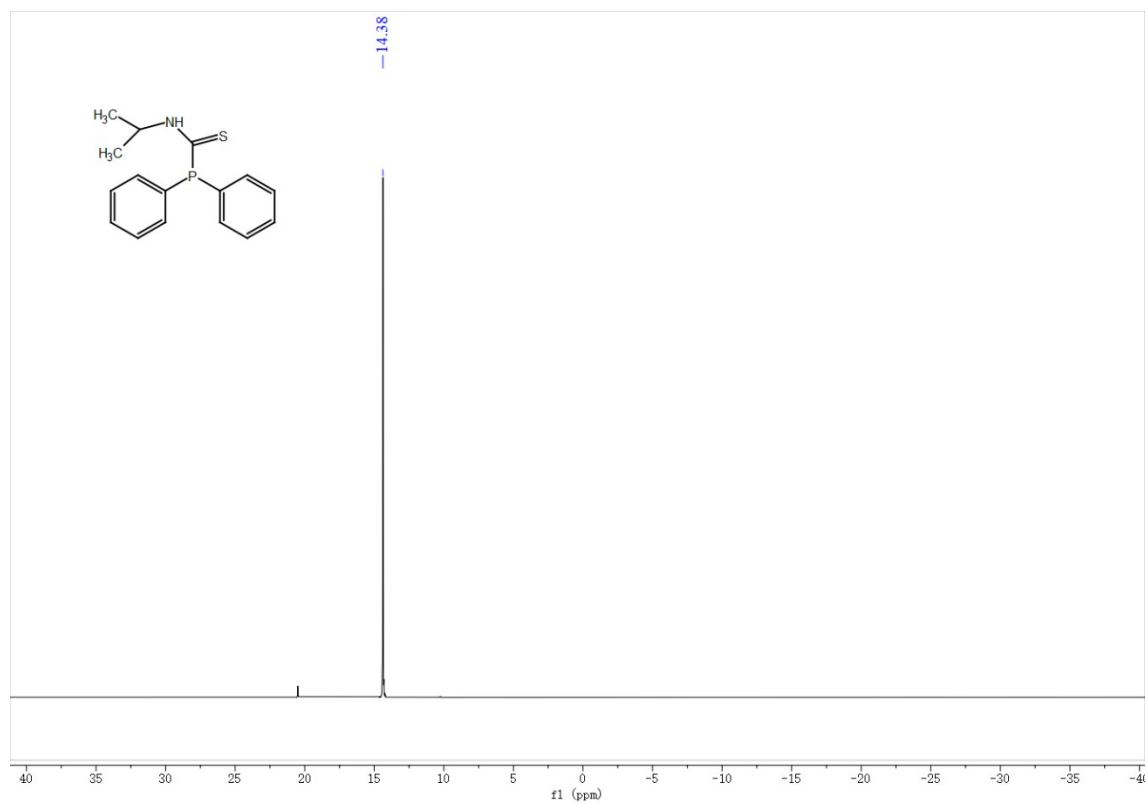

**Figure S24.**  $^{31}\text{P}$  NMR spectrum (162 MHz, 298K,  $\text{CDCl}_3$ ) of **9f**

$\text{Ph}_2\text{PC(S)NHCy}$  (**9g**)

Green solid (97% yield).  $^1\text{H}$  NMR (400 MHz,  $\text{CDCl}_3$ , ppm)  $\delta$  7.43 – 7.32 (m, 10H, Ar-H), 7.12 – 7.04 (m, 1H, NH), 4.52 – 4.39 (m, 1H, CH), 1.89 – 1.81 (m, 2H,  $\text{CH}_2$ ), 1.52 – 1.23 (m, 5H,  $\text{CH}_2$ ), 1.16 – 0.99 (m, 3H,  $\text{CH}_2$ ).

$^{13}\text{C}$  NMR (101 MHz,  $\text{CDCl}_3$ , ppm)  $\delta$  208.02 – 199.87 (d,  $J = 38.0$  Hz), 138.05 – 130.33 (d,  $J = 20.4$  Hz), 129.68 – 128.62, 128.53 – 127.29 (d,  $J = 7.3$  Hz), 54.40, 31.63, 25.09, 23.48.  $^{31}\text{P}$  NMR (162 MHz,  $\text{CDCl}_3$ , ppm)  $\delta$  -14.01.

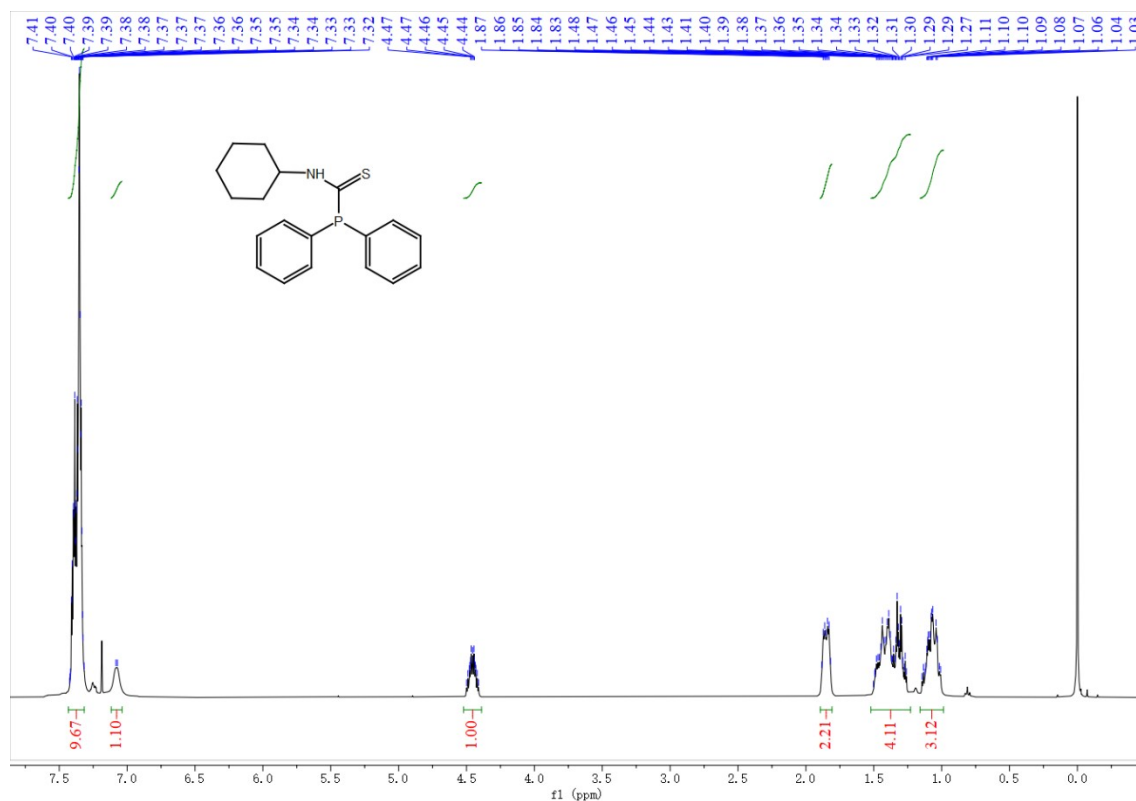

**Figure S25.**  $^1\text{H}$  NMR spectrum (400 MHz, 298K,  $\text{CDCl}_3$ ) of **9g**

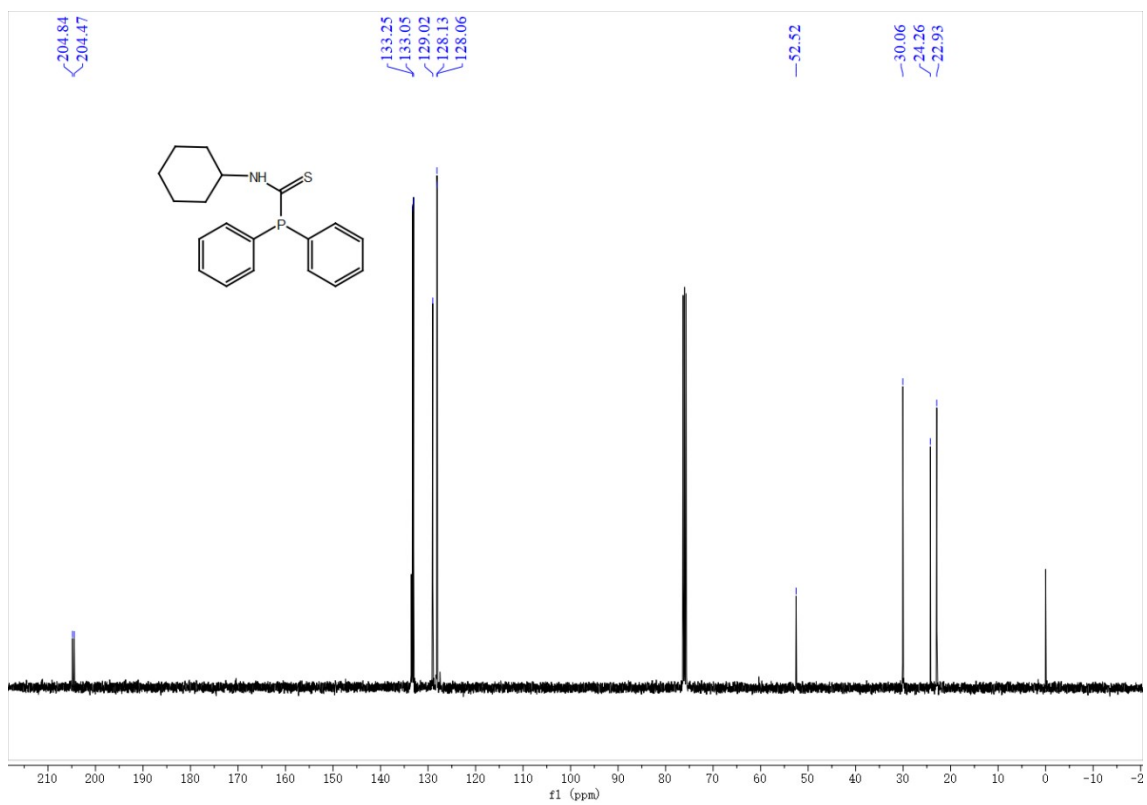

**Figure S26.**  $^{13}\text{C}$  NMR spectrum (101 MHz, 298K,  $\text{CDCl}_3$ ) of **9g**

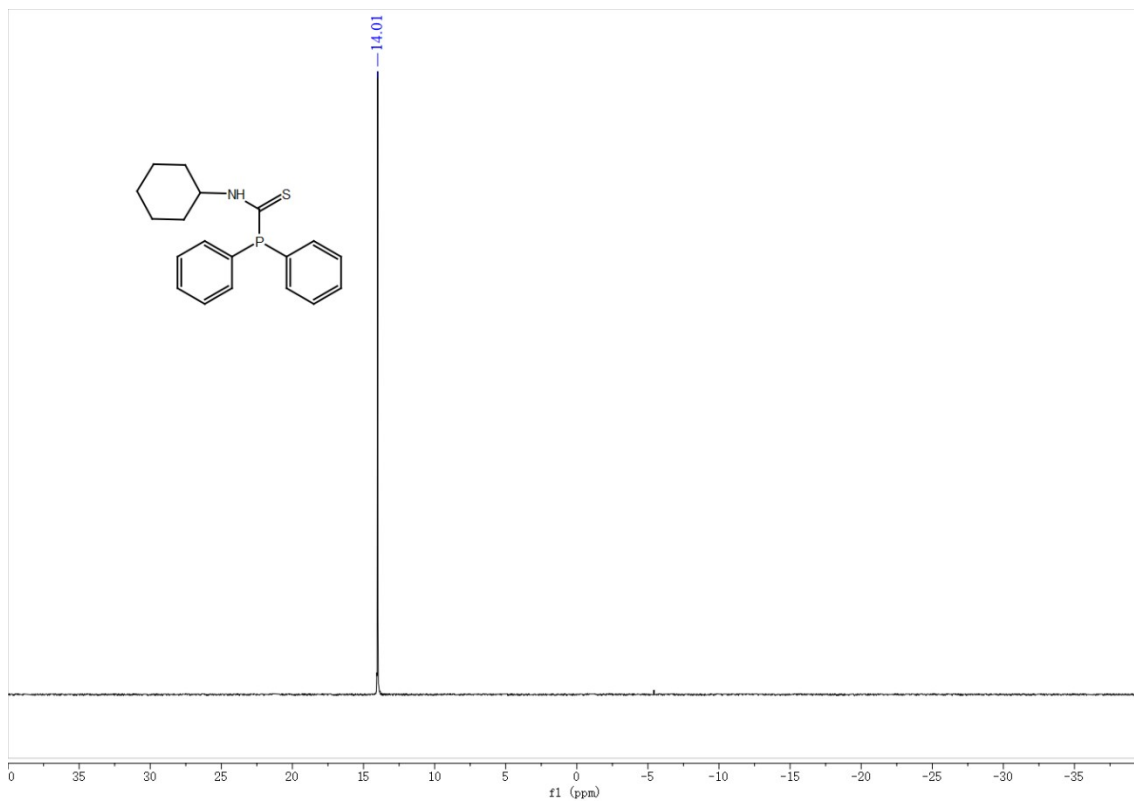

**Figure S27.**  $^{31}\text{P}$  NMR spectrum (162 MHz, 298K,  $\text{CDCl}_3$ ) of **9g**

$\text{Ph}_2\text{PC}(\text{S})\text{NH}(\textit{t}\text{Bu})$  (**9h**)

Green solid (62% yield).  $^1\text{H}$  NMR (400 MHz,  $\text{CDCl}_3$ , ppm)  $\delta$  7.43 – 7.30 (m, 10H, Ar-H), 7.02 – 6.97 (s, 1H, NH), 1.43 – 1.31 (s, 9H, *t*Bu).  $^{13}\text{C}$  NMR (101 MHz,  $\text{CDCl}_3$ , ppm)  $\delta$  205.79 – 204.63 (d,  $J = 39.8$  Hz), 135.11 – 133.60 (d,  $J = 17.3$  Hz), 133.48 – 132.31 (d,  $J = 20.2$  Hz), 129.36, 128.38 – 127.70 (d,  $J = 7.1$  Hz), 57.99, 28.71 – 22.54 (d,  $J = 1.4$  Hz).  $^{31}\text{P}$  NMR (162 MHz,  $\text{CDCl}_3$ , ppm)  $\delta$  -17.17.

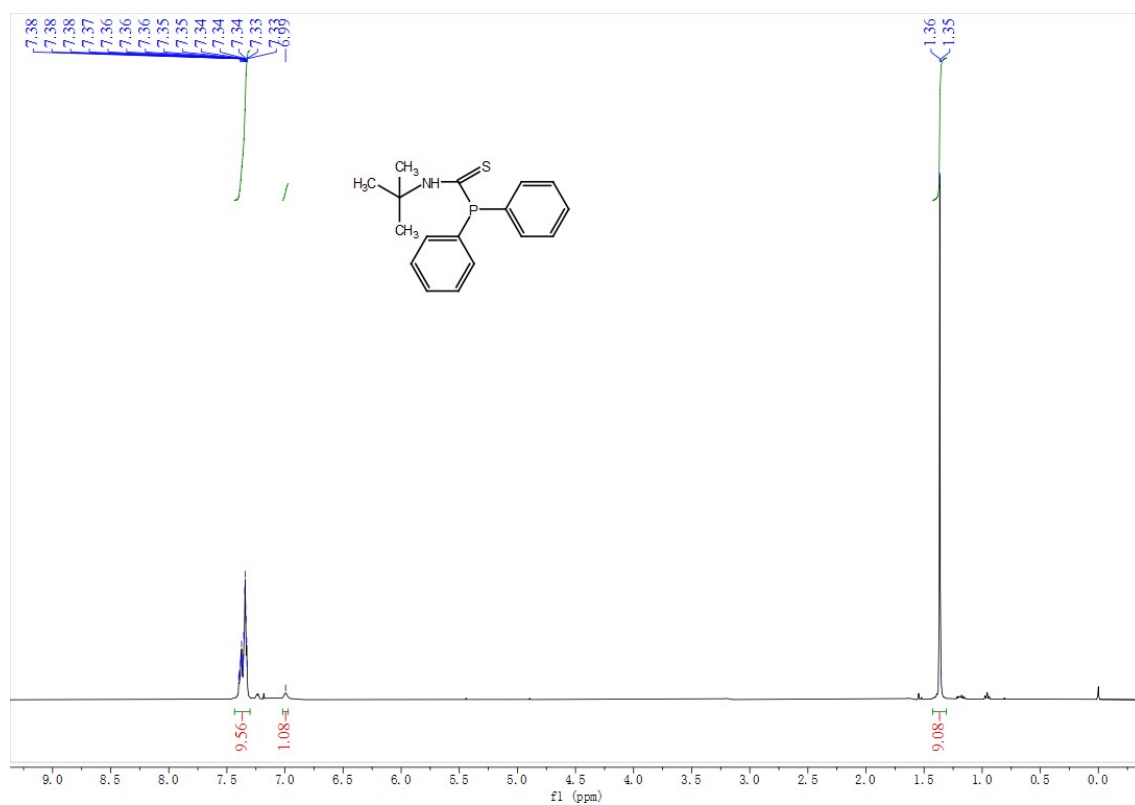

**Figure S28.**  $^1\text{H}$  NMR spectrum (400 MHz, 298K,  $\text{CDCl}_3$ ) of **9h**

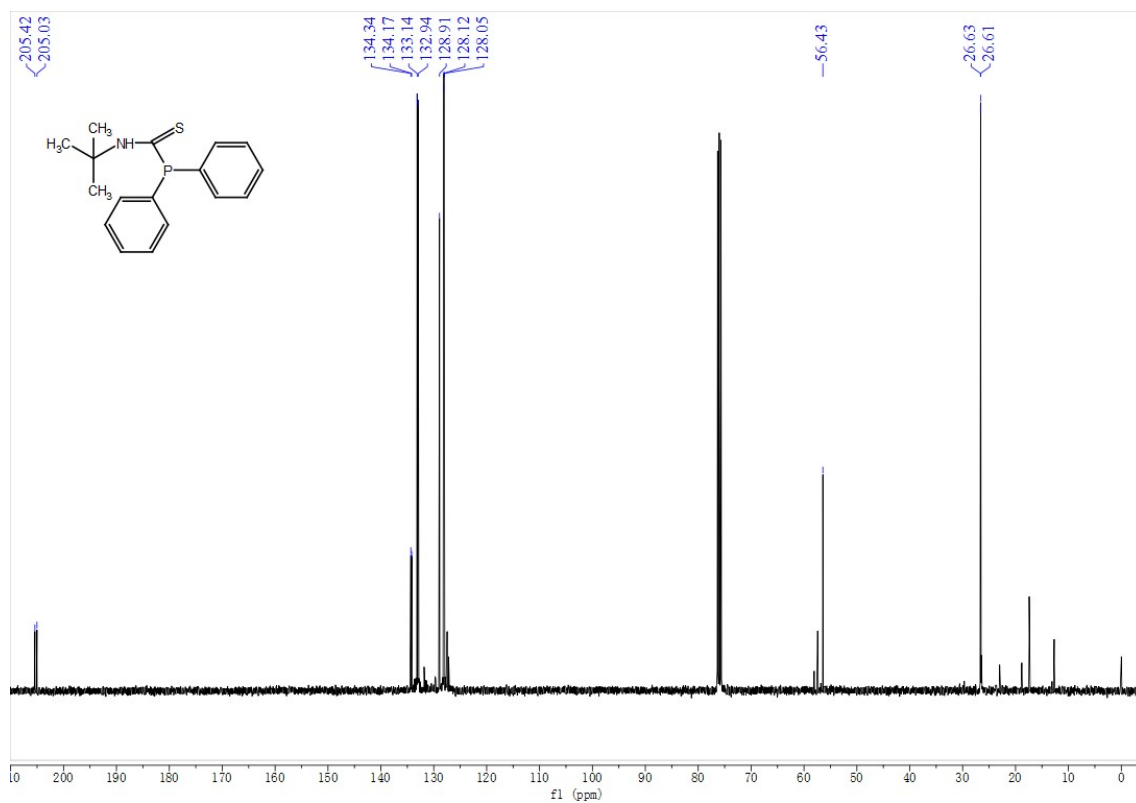

Figure S29.  $^{13}\text{C}$  NMR spectrum (101 MHz, 298K,  $\text{CDCl}_3$ ) of 9h

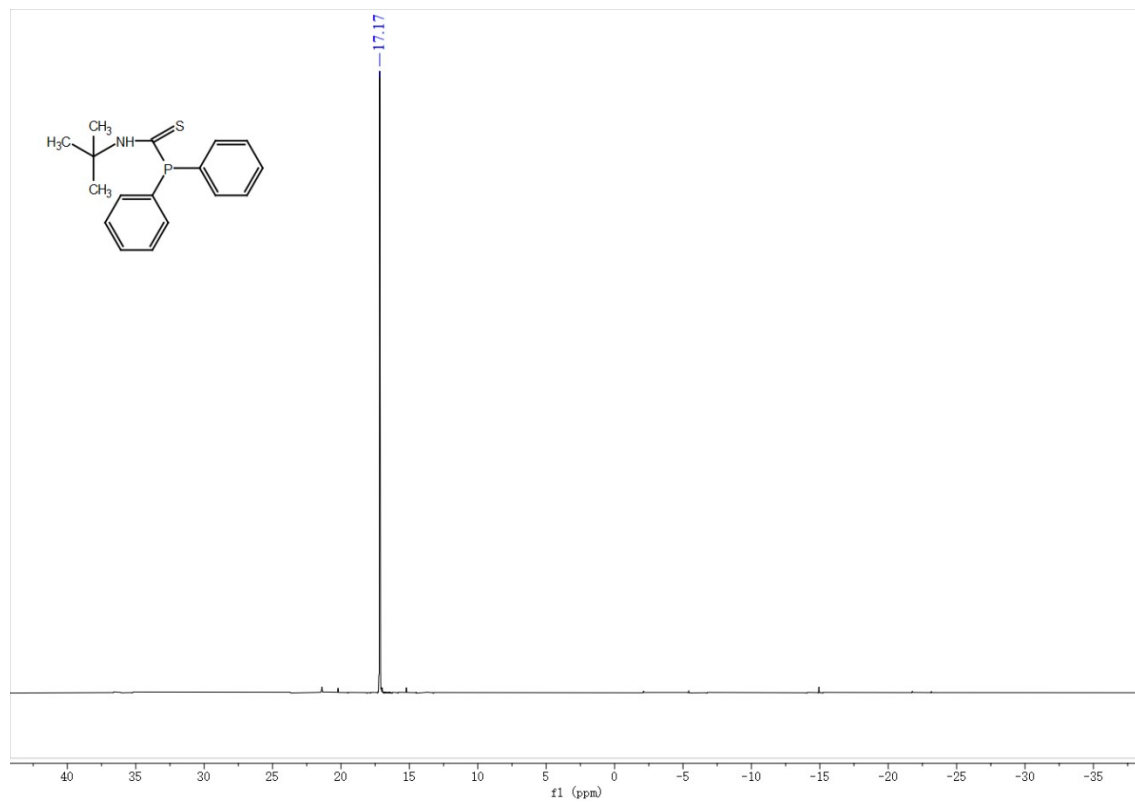



**Figure S30.**  $^{31}\text{P}$  NMR spectrum (162 MHz, 298K,  $\text{CDCl}_3$ ) of **9h**

$\text{Ph}_2\text{PC(O)NH}(2,6\text{-}i\text{Pr}_2\text{C}_6\text{H}_3)$  (**9i**)

White solid (99% yield).  $^1\text{H}$  NMR (400 MHz,  $\text{CDCl}_3$ , ppm)  $\delta$  7.68 – 7.54 (m, 4H, Ar-*H*), 7.36 – 7.32 (m, 6H,

Ar-*H*), 7.21 – 7.12 (m, 1H, Ar-*H*), 7.08 – 6.98 (m, 2H, Ar-*H*), 6.79 – 6.54 (s, 1H, NH), 2.91 – 2.80 (m, 2H,

$\text{CH}(\text{CH}_3)_2$ ), 1.07 – 1.01 (m, 12H,  $\text{CH}(\text{CH}_3)_2$ ).  $^{13}\text{C}$  NMR (101 MHz,  $\text{CDCl}_3$ , ppm)  $\delta$  180.47 – 170.75 (d,  $J = 15.0$

Hz), 147.71, 135.26 – 132.08 (d,  $J = 19.5$  Hz), 132.62 – 132.19 (d,  $J = 10.8$  Hz), 129.27, 128.27 – 127.16 (d,  $J =$

7.5 Hz), 123.31, 30.00, 23.87.  $^{31}\text{P}$  NMR (162 MHz,  $\text{CDCl}_3$ , ppm)  $\delta$  -3.27.

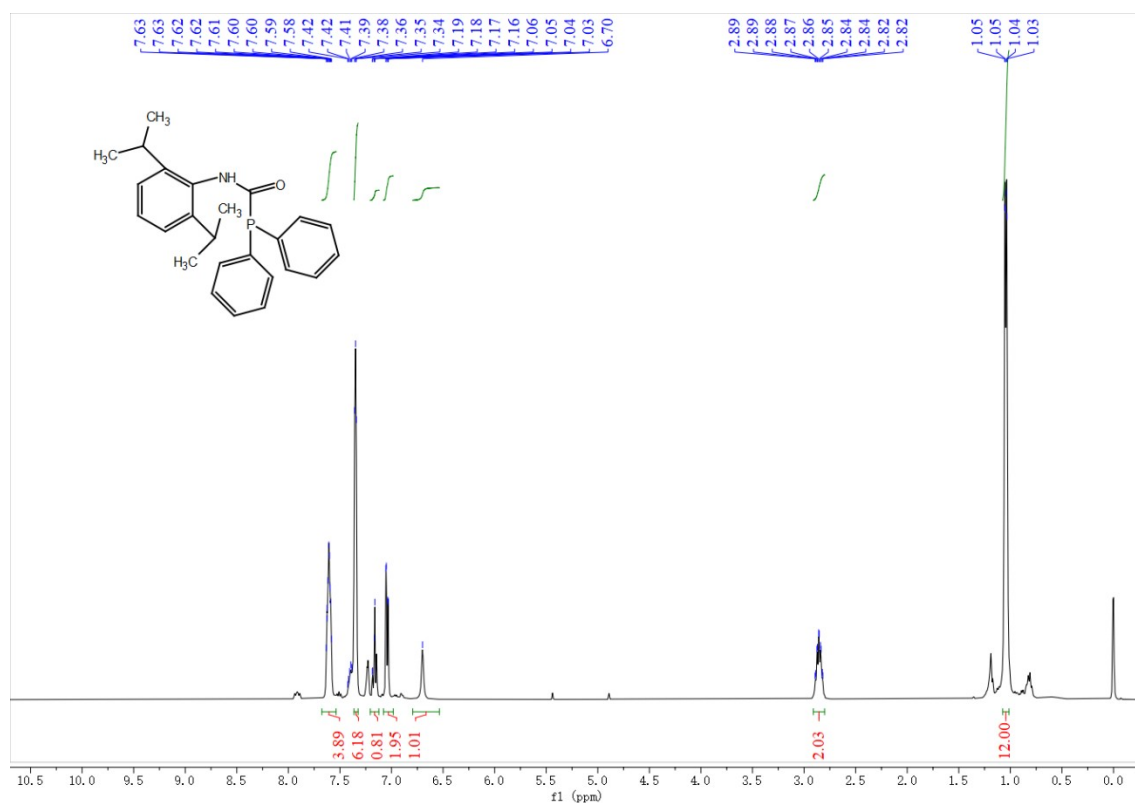

**Figure S31.**  $^1\text{H}$  NMR spectrum (400 MHz, 298K,  $\text{CDCl}_3$ ) of **9i**

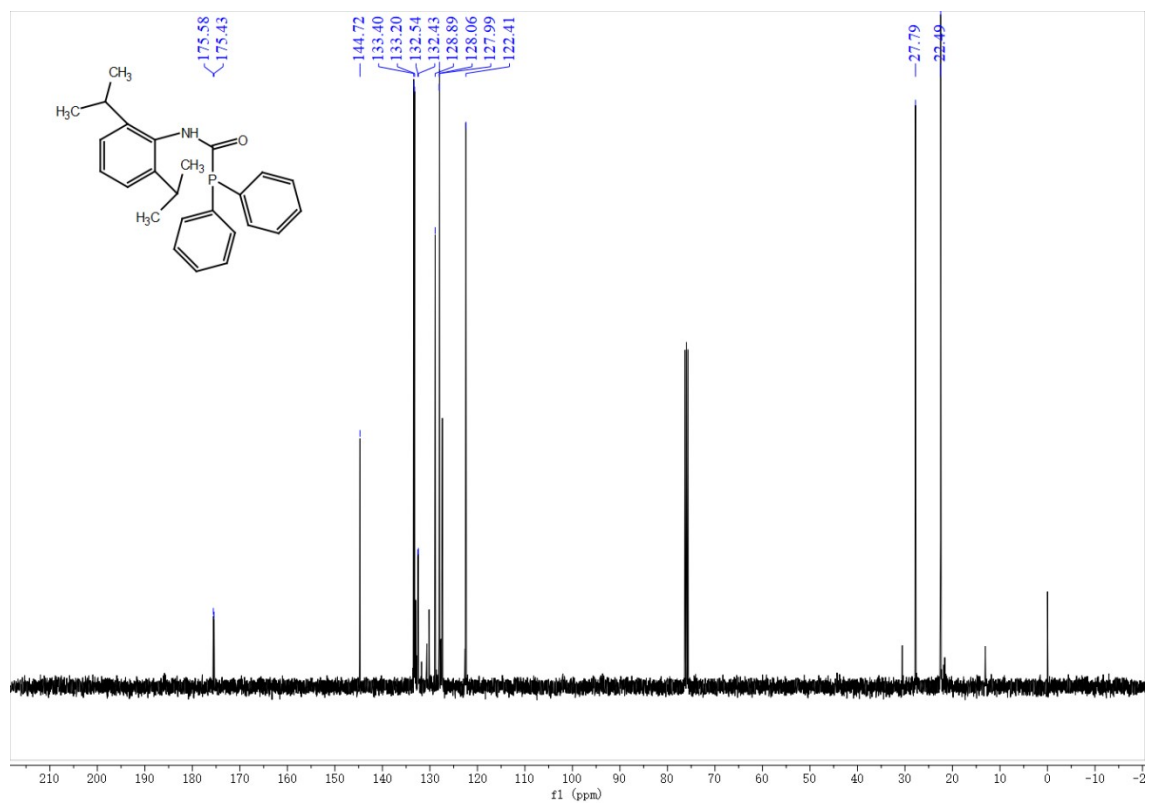

**Figure S32.** <sup>13</sup>C NMR spectrum (101 MHz, 298K, CDCl<sub>3</sub>) of **9i**

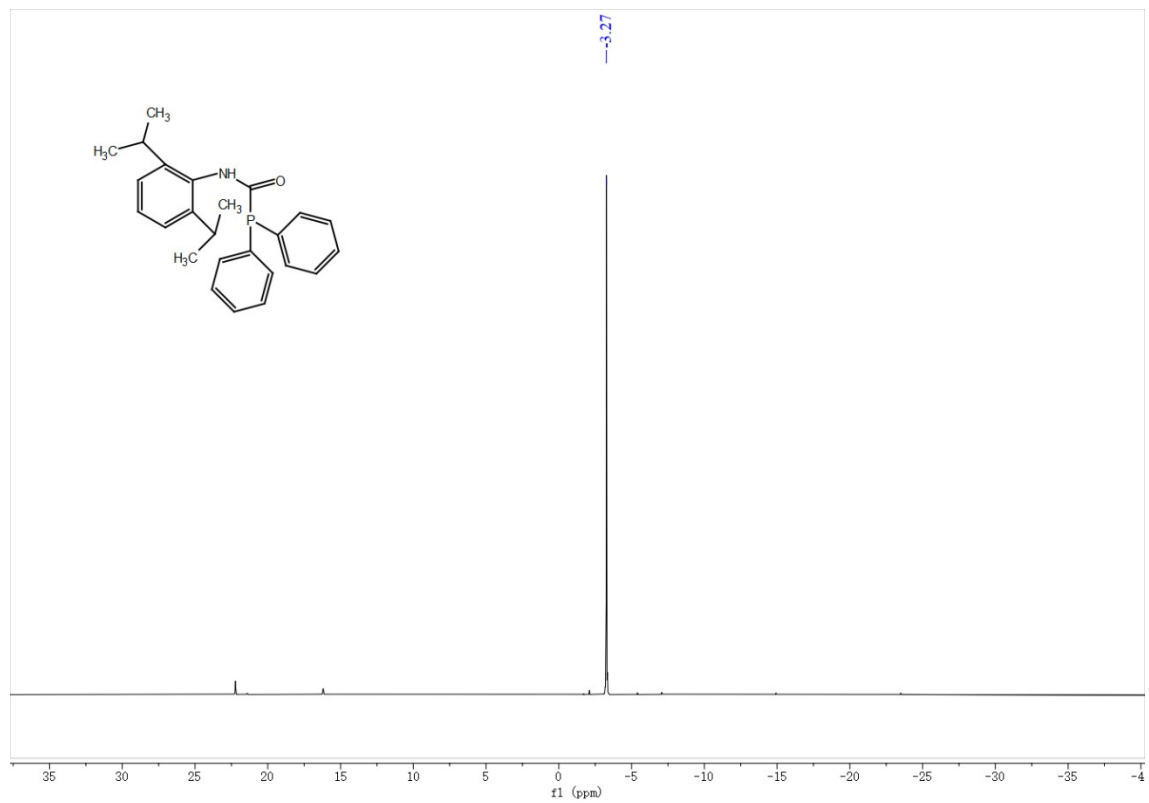

**Figure S33.**  $^{31}\text{P}$  NMR spectrum (162 MHz, 298K,  $\text{CDCl}_3$ ) of **9i**

$\text{Ph}_2\text{PC(O)NH}(2,6\text{-}^i\text{Pr}_2\text{C}_6\text{H}_3)$  (**9j**) and  $\text{Ph}_2\text{PC(O)N}(2,6\text{-}^i\text{Pr}_2\text{C}_6\text{H}_3)\text{C(O)NH}(2,6\text{-}^i\text{Pr}_2\text{C}_6\text{H}_3)$  (**9k**)

The emergence of  $\text{CH}(\text{CH}_3)_2$  signal of single insertion product **9j** at  $\delta$  1.24 – 1.13 ppm. Analogous,  $\text{CH}(\text{CH}_3)_2$  signal of double insertion product **9k** emerges at  $\delta$  1.24 – 1.13 ppm and  $\delta$  0.97 – 0.90 ppm, and partially overlap with **6j** at  $\delta$  1.24 – 1.13 ppm. The ratio of the two products **9j** and **9k** can be obtained from the integration of the signal areas at the two locations.

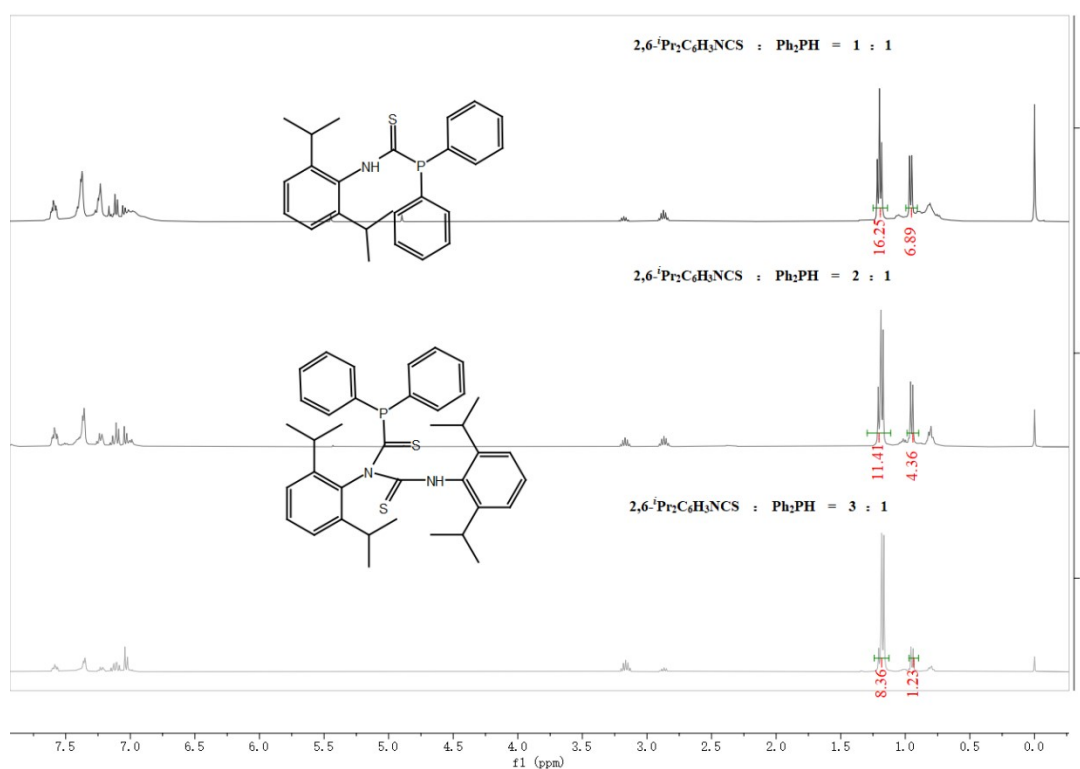

**Figure S34.**  $^1\text{H}$  NMR spectrum (400 MHz, 298K,  $\text{CDCl}_3$ ) of **9j** and **9k**

## References

- [1] Z. Yang, M. Zhong, X. Ma, K. Nijesh, S. De, P. Parameswaran and H. W. Roesky, *J. Am. Chem. Soc.*, 2016, **138**, 2548-2551.
- [2] G. Feng, C. Du, L. Xiang, I. del Rosal, G. Li, X. Leng, E. Y. X. Chen, L. Maron and Y. Chen, *ACS Catal.*, 2018, **8**, 4710-4718.
- [3] W.-X. Zhang, M. Nishiura and Z. Hou, *Chem. Commun. (Cambridge, U. K.)*, 2006, **36**, 3812-3814.
- [4] M. R. Crimmin, A. G. M. Barrett, M. S. Hill, P. B. Hitchcock and P. A. Procopiou, *Organometallics*, 2008, **27**, 497-499.
- [5] A. C. Behrle and J. A. R. Schmidt, *Organometallics*, 2013, **32**, 1141-1149.
- [6] X. Gu, L. Zhang, X. Zhu, S. Wang, S. Zhou, Y. Wei, G. Zhang, X. Mu, Z. Huang, D. Hong and F. Zhang, *Organometallics*, 2015, **34**, 4553-4559.
- [7] A. Martinez, S. Moreno-Blazquez, A. Rodriguez-Dieguez, A. Ramos, R. Fernandez-Galan, A. Antinolo and F. Carrillo-Hermosilla, *Dalton Trans.*, 2017, **46**, 12923-12934.
- [8] T. M. Horsley Downie, J. W. Hall, T. P. Collier Finn, D. J. Liptrot, J. P. Lowe, M. F. Mahon, C. L. McMullin and M. K. Whittlesey, *Chem. Commun. (Cambridge, U. K.)*, 2020, **56**, 13359-13362.
- [9] M. Itazaki, T. Matsutani, T. Nochida, T. Moriuchi and H. Nakazawa, *Chem. Commun. (Cambridge, U. K.)*, 2020, **56**, 443-445.
- [10] J. G. Noltes, *Recueil Des Travaux Chimiques Des Pays-Bas*, 1965, **84**, 782-&.

[11] G. M. Sheldrick SADABS, University of Göttingen, Germany, 1997, **28**, 53-56.

[12] G. Sheldrick, *Acta Crystallogr. A*, 2015, **71**, 3-8.

[13] G. Sheldrick, *Acta Crystallogr. C*, 2015, **71**, 3-8.
